1 **Cytokinin induction by the jasmonate-induced *AP2/ERF115* represses adventitious**  
2 **rooting in *Arabidopsis***

3

4 **Abdellah Lakehal<sup>1</sup>, Asma Dob<sup>1</sup>, Zahra Rahnesan<sup>1,2,a</sup>, Ondřej Novák<sup>3,4</sup>, Sacha Escamez<sup>1</sup>,**  
5 **Sanaria Alallaq<sup>1</sup>, Miroslav Strnad<sup>3</sup>, Hannele Tuominen<sup>1</sup>, Catherine Bellini<sup>1,5\*</sup>**

6

7 <sup>1</sup> Umeå Plant Science Centre, Department of Plant Physiology, Umeå University, SE-  
8 90736 Umeå, Sweden

9 <sup>2</sup> Department of Biology, Faculty of Science, Shahid Bahonar University, Kerman  
10 76169-14111, Iran

11 <sup>3</sup> Laboratory of Growth Regulators, Faculty of Science, Palacký University and Institute of  
12 Experimental Botany, The Czech Academy of Sciences, 78371 Olomouc, Czech Republic

13 <sup>4</sup> Umeå Plant Science Centre, Department of Forest Genetics and Physiology, Swedish  
14 Agriculture University, SE-90183 Umea, Sweden

15 <sup>5</sup> Institut Jean-Pierre Bourgin, INRAE, AgroParisTech, Université Paris-Saclay, FR-78000  
16 Versailles, France

17

18 <sup>a</sup> Present address: Umeå Plant Science Centre, Department of Forest Genetics and Physiology,  
19 Swedish Agriculture University, SE-90183 Umea, Sweden

20

21 \* To whom correspondence should be addressed:

22 Pr Catherine Bellini (Catherine.Bellini@umu.se /Catherine.Bellini@inra.fr)

23 Umeå Plant Science Centre, Department of Plant Physiology,

24 Umeå University, SE-90736 Umeå, Sweden

25 Phone: +46907869624

26

27 **Short title:** Jasmonate-induced *ERF115* controls ARI by modulating cytokinin signaling

28

29

30

31 **ABSTRACT**

32 Jasmonate (JA), an oxylipin-derived phytohormone, plays crucial roles not only in plant  
33 immunity and defense against herbivorous insects but also in plant growth and developmental  
34 processes, including regeneration and organogenesis. However, the mechanistic basis of its  
35 mode of action and precise role in integrating other signaling cues are poorly understood. Here  
36 we provide genetic indications that JA signaling acts in both NINJA-dependent and -  
37 independent modulation of the transcriptional activity of MYC transcription factors involved  
38 in inhibition of adventitious root initiation (ARI). Our data indicate that NINJA-dependent JA  
39 signaling in pericycle cells blocks early events of ARI. Moreover, transcriptomic comparison  
40 of *ninja-1myc2-322B* double mutant (which produce extremely few ARs) and wild type  
41 seedlings identified a novel molecular network governed by the APETALA2/ETHYLENE  
42 RESPONSE FACTOR 115 (ERF115) transcription factor. Our data show that JA-induction of  
43 *ERF115* expression inhibits ARI in a cytokinin-dependent manner. Altogether, our results  
44 reveal a molecular network involving cooperative crosstalk between JA and CK machineries  
45 that inhibits ARI.

46

47 **Key words:**

48 Jasmonate, cytokinins, adventitious rooting, AP2/ERF transcription factors, *de novo*  
49 organogenesis.

## 50 INTRODUCTION

51 Jasmonate (JA), a stress-induced phytohormone, plays crucial roles in plant immunity and  
52 defense against herbivorous insects (Wasternack and Hause, 2013). It also participates in  
53 control of diverse developmental processes, including tissue regeneration and rhizotaxis  
54 (Wasternack and Hause, 2013; Lakehal et al., 2020). The isomer (+)-7-iso-JA-Ile (JA-Ile), the  
55 bioactive form of JA (Fonseca et al., 2009), is perceived by the F-box protein CORONATINE  
56 INSENSITIVE1 (COI1), which is an integral component of the Skp-Cullin-F-box (SCF)  
57 complex (Xie et al., 1998). The COI1 receptor fine-tunes the function of the JA transcriptional  
58 machinery in a simple manner. Briefly, in the resting state, marked by low JA-Ile contents, the  
59 transcriptional activity of a number of transcription factors, including the basic-Helix-loop-  
60 Helix MYC, is repressed by JASMONATE ZIM DOMAIN (JAZ) repressors through either  
61 physical interaction or recruitment of the general co-repressor TOPLESS (TPL) or TPL-related  
62 proteins (TPRs) (Chini et al., 2007; Thines et al., 2007; Yan et al., 2007). The adaptor NOVEL  
63 INTERACTOR OF JAZ (NINJA) mediates interaction of JAZs with TPL or TRPs (Pauwels et  
64 al., 2010). During activation, marked by accumulation of JA-Ile, JAZs form co-receptor  
65 complexes with COI1. This interaction is facilitated by JA-Ile, which acts as a molecular glue  
66 (Sheard et al., 2010). Formation of the co-receptor complexes triggers ubiquitylation and  
67 proteasome-dependent degradation of the targeted JAZs, thereby releasing the transcription  
68 factors to transcriptionally induce or repress their downstream target genes. Biochemical  
69 studies suggest that JAZ-dependent repression machinery can inhibit the transcriptional activity  
70 of different MYCs in different ways, depending on the JAZ protein involved (Chini et al.,  
71 2016). However, the biological roles of this multilayered regulation are unclear, largely because  
72 multiple *jaz* mutations may cause phenotypic deviations, but not single loss-of-function  
73 mutations (Campos et al., 2016; Guo et al., 2018).

74 JA signaling counteracts or cooperates with a number of hormonal and signaling cascades in  
75 the control of plant growth and development (Wasternack and Hause, 2013). We have  
76 previously shown that the COI1-dependent MYC2-mediated JA signaling inhibited the intact  
77 hypocotyl-derived ARI downstream of the auxin signaling machinery (Gutierrez et al., 2012)  
78 (Figure 1). Accordingly, in contrast to the *MYC2*-overexpressing line *35S:MYC2*, the loss-of-  
79 function mutant *myc2* produces more ARs than wild type plants, indicating that MYC2 plays  
80 an important role in inhibition of ARI downstream of auxin (Gutierrez et al., 2012). Recently,  
81 we also showed that the TIR1- and AFB2-dependent auxin signaling pathways promote ARI  
82 by negatively controlling JA content (Lakehal et al., 2019a). However, despite evidence of its

83 central role in modulating ARI, the basis (genetic and mechanistic) and downstream targets of  
84 the MYC2-mediated JA signaling involved in this process remained unclear.  
85 Recently, Zhou and collaborators (Zhou et al., 2019) showed that two members of subgroup X  
86 of the *APETALA2/ETHYLENE RESPONSE FACTOR (ERF)* family (*ERF109* and *ERF115*)  
87 promote root stem cell niche replenishment and tissue regeneration after excision, and their  
88 expression is directly controlled by MYC2-mediated JA signaling. The *ERF115* transcription  
89 factor and its two closest homologs, *ERF114* (also known as *ERF BUD ENHANCER (EBE)*)  
90 and *ERF113* (also known as *RELATED to AP2.6L, RAP2.6L*) have been shown to control  
91 various regenerative processes, such as callus formation, tissue repair, root stem cell niche  
92 maintenance and root growth (Che et al., 2006; Nakano et al., 2006; Asahina et al., 2011;  
93 Mehrnia et al., 2013; Heyman et al., 2016; Ikeuchi et al., 2018; Kong et al., 2018; Yang et al.,  
94 2018). The three genes are rapidly induced by mechanical wounding (Ikeuchi et al., 2017),  
95 suggesting that they play an important role in connecting the stress-induced JA signaling  
96 machinery with other signaling cascades in provision of correct cell-fate and/or developmental  
97 inputs for organogenesis processes. However, how these genes coordinate and integrate the  
98 stress-induced hormonal pathways to ensure these multifunctionalities is still largely unclear.  
99 Here we provide evidence that the JA signaling machinery inhibits ARI in both NINJA-  
100 dependent and -independent manners, and the JA-induced *ERF115* transcription factor inhibits  
101 this process in a CK-dependent manner, suggesting that CKs act downstream of JA in ARI  
102 inhibition.  
103

## 104 RESULTS

105

### 106 NINJA-dependent and -independent JA signaling repress AR initiation

107 To better understand the role of JA signaling during intact hypocotyl-derived ARI (Figure 1),  
108 we first analyzed the AR phenotype of multiple *jaz* mutants, under previously described  
109 conditions (Sorin et al., 2005; Gutierrez et al., 2009; Gutierrez et al., 2012). The quadruple loss-  
110 of-function mutant *jaz7jaz8jaz10jaz13* (Thireault et al., 2015) had the same phenotype as the  
111 wild type, whereas the quintuple mutant *jazQ* (*jaz1jaz3jaz4jaz9jaz10*) (Campos et al., 2016)  
112 produced slightly fewer ARs than wild type plants (Figure 2A). These data confirm the high  
113 functional redundancy of the 13 *JAZ* genes in the Arabidopsis genome (Chini et al., 2007;  
114 Thines et al., 2007; Yan et al., 2007; Thireault et al., 2015; Chini et al., 2016), which  
115 complicates characterization of their specificity. Therefore, we analyzed the phenotype of the  
116 gain-of-function mutant *myc2-322B*, which harbors a point mutation in the transcriptional  
117 activation domain (TAD) that changes Glutamate 165 to Lysine. This prevents MYC2's  
118 interaction with most JAZ repressor proteins, resulting in almost constitutive MYC2 signaling  
119 (Gasperini et al., 2015). We found that *myc2-322B* produced slightly fewer AR than wild type  
120 plants (Figure 2B), in accordance with our previous findings that the loss-of-function mutant  
121 *myc2* and overexpressing line *35S:MYC2* respectively produced more and less ARs than wild  
122 type counterparts (Gutierrez et al., 2012). We also analyzed the AR phenotype associated with  
123 two loss-of-function *ninja* (*ninja-1* and *ninja-2*) alleles (Acosta et al., 2013), because the NINJA  
124 adaptor is a central hub in the transcriptional repression machinery that inactivates MYC  
125 transcription factors (Pauwels et al., 2010) (Figure 1). *Ninja-1* and *ninja-2* mutants produced  
126 significantly fewer ARs than wild type plants (Figure 2B), but their phenotypic deviation is  
127 weak, presumably due to presence of a NINJA-independent pathway that continues to repress  
128 MYCs and thus allows ARI. Because MYC2 acts additively with MYC3 and MYC4 in the  
129 inhibition of ARI (Gutierrez et al., 2012), we hypothesized that removing NINJA in a *myc2-*  
130 *322B* background might abolish the remaining NINJA-dependent repression and hence release  
131 activity of the three MYCs. De-repression of these transcription factors would then result in  
132 constitutively enhanced MYC-mediated JA signaling and block the ARI process. To test this  
133 hypothesis, we analyzed the AR phenotype of two independent double mutants: *ninja-1myc2-*  
134 *322B* and *ninja-2myc2-322B* (Gasperini et al., 2015). We found that ARI was almost  
135 completely inhibited in both double mutants, confirming the inhibitory effect of JA (Figure 2B-  
136 E). As expected, the double mutants had shorter primary roots (PRs) than wild type plants, due  
137 to the inhibitory effect of JA signaling on PR growth (Staswick et al., 1992) and fewer lateral

138 roots (LRs; Supplemental Figure 1A,B), but the LR density was not affected (Figure 2C). To  
139 get further genetic evidence, we also analyzed the AR phenotype of the gain-of-function mutant  
140 *atr2D*, which harbors a point mutation in the JAZ interaction domain (JID) of the MYC3 protein  
141 (Smolen et al., 2002) that prevents its interaction with a subset of JAZ repressors (Zhang et al.,  
142 2015). Notably, there was no significant difference in AR numbers of *atr2D* mutants and wild  
143 type plants, but the *ninja-1atr2D* double mutant produced far fewer ARs (Figure 2B),  
144 confirming the *atr2D* mutation's additive effect and the role of MYC3 in the control of AR  
145 formation. Collectively, these results genetically confirm the importance of the NINJA-  
146 dependent and -independent pathways in the control of AR initiation.

147

### 148 ***NINJA* and *MYC2* are expressed in the etiolated hypocotyl**

149 To examine spatiotemporal expression patterns of the *NINJA* and *MYC2* genes during early  
150 ARI events, we used seedlings harboring *pNINJA:GUS* or *pMYC2:GUS* transcriptional fusions  
151 (Gasperini et al., 2015). The seedlings were grown in ARI-inducing conditions in the dark and  
152 sampled for *pNINJA:GUS* or *pMYC2:GUS* expression analysis at T0, just before some of the  
153 etiolated seedlings were exposed to light. Further samples were collected at T9L and T24L  
154 (after 9 and 24 h growth in long-day conditions, respectively), while controls were sampled at  
155 T9D and T24D (after a further 9 and 24 h growth in the dark, respectively). The two promoters  
156 were shown to be constitutively active in all the organs at all time points, although *MYC2*  
157 promoter activity declined in the cotyledons over time (Figure 3A to E). These data indicate  
158 that *NINJA* and *MYC2* genes have overlapping expression domains in the hypocotyl.

159

### 160 **Expressing *NINJA* in xylem-pole pericycle cells is sufficient to counter JA's negative effect** 161 **during ARI**

162 We confirmed that the *NINJA* protein was broadly expressed in the hypocotyl, including the  
163 xylem-pole pericycle (xpp) cells (Figure 3F) where ARs are initiated (Sorin et al., 2005;  
164 Sukumar et al., 2013). We then assessed whether re-activating the *NINJA*-dependent JA  
165 repression machinery in those cells would be sufficient to restore ARI in the *ninja1-myc2-322B*  
166 double mutant. For this, we produced translational fusions of *NINJA* with the mCITRINE  
167 reporter driven by two xpp cell-specific promoters, *GATA23* (De Rybel et al., 2010) and *XPP*  
168 (Andersen et al., 2018). The *pGATA23:NINJA:mCITRINE* or *pXPP:NINJA:mCITRINE*  
169 constructs were introduced into the *ninja1-myc2-322B* double mutant, and we confirmed that  
170 the *NINJA:mCITRINE* protein was specifically present in the hypocotyl xpp cells (Figure 3G  
171 and 3H). We analyzed the AR phenotype of two independent lines carrying each construct and

172 showed that in both cases the effect of the *ninja-1* mutation was complemented (Figure 3I).  
173 These results suggest that expressing NINJA in xpp cells is sufficient to de-repress ARI, and  
174 that NINJA-dependent JA signaling acts in early stages of ARI.

175

### 176 **Transcriptomic insights into JA's role in ARI**

177 To get mechanistic insights into how JA signaling reprograms the transcriptional machinery  
178 during ARI, we compared transcriptomes of *ninja-1myc2-322B* double mutant and wild-type  
179 hypocotyls at three time points: T0, T9 and T24 (Figure 4A). In T0 samples we detected 530  
180 differentially expressed genes (DEGs), of which 462 were upregulated and 68 downregulated  
181 in the *ninja-1myc2-322B* double mutant. We detected 671 DEGs at T9, 453 upregulated and  
182 218 downregulated, and 579 at T24, 388 upregulated and 191 downregulated (Figure 4B,  
183 Supplemental Figure 2 and Supplemental Table 1).

184

### 185 **The *ninja-1myc2-322B* double mutant has a constitutive JA response signature**

186 MYC transcription factors recognize and bind to hexameric *cis*-regulatory G-box motifs  
187 (CACGTG or CACATG), and MYC2 binds to G box-like motifs (AACGTG, CATGTG,  
188 CACGAG, CACATG, CACGCG) with differing affinities (Godoy et al., 2011). To get an  
189 overview of possible direct targets of MYCs among the DEGs, we searched for these motifs in  
190 the 1 kb regions upstream of their ATG translation start codons. We found that DEGs'  
191 promoters are highly enriched with MYC binding sites, suggesting that they include potential  
192 direct targets of MYC. At T0, T9 and T24, 64% of 520 DEGs (342: 334 upregulated and 8  
193 downregulated), 62% of 671 DEGs (420: 341 upregulated and 79 downregulated), and 67% of  
194 579 DEGs (389: 287 upregulated and 102 downregulated) respectively contained at least one  
195 of the six motifs (Figure 4C).

196 Most of the *JAZ* genes, which are early JA-responsive genes, were highly upregulated in the  
197 *ninja-1myc2-322B* double mutant at all sampling time points (Figure 4D), confirming the  
198 presence of enhanced, constitutive JA signaling. Accordingly, several genes involved in JA  
199 biosynthesis, such as *LIPOXYGENASE 2 (LOX2)*, *ALLENE OXIDE SYNTHASE (AOS)*,  
200 *ALLENE OXIDE CYCLASE1 (AOC1)*, *AOC3*, *AOC4*, *OXOPHYTODIENOATE-*  
201 *REDUCTASE3 (OPR3)* and *OPC-8:0 COA LIGASE1 (OPCL1)* were upregulated in the double  
202 mutant *ninja-1myc2-322B* (Figure 4E). The biological relevance of this upregulation of gene  
203 expression was confirmed by findings that levels of the JA precursor *cis*-12-oxo-phytodienoic  
204 acid (*cis*-OPDA), JA and JA-Ile were higher in the double mutant than in wild-type controls at  
205 all time points, except that JA-Ile contents did not significantly differ at T0 (Figure 4F-H).



206 These data highlight a feedforward loop that amplifies the response to JA signaling by  
207 enhancing JA biosynthesis.

208

### 209 **JA signaling controls expression of *ERF113*, *ERF114* and *ERF115* transcription factors.**

210 The candidate transcription factor potential targets of MYC2 we detected included three closely  
211 related members of subgroup X of the *ERF* family (*ERF113*, *ERF114* and *ERF115*) (Figure  
212 5A,B). Analysis by qRT-PCR confirmed that these three genes were all upregulated in the  
213 hypocotyl of the *ninja-1myc2-322B* double mutant, except *ERF113* at T0 (Figure 5C). These  
214 genes have known involvement in a number of organogenesis and regeneration processes  
215 (Heyman et al., 2018). To address their role in ARI, we analyzed the AR phenotypes of  
216 available single loss of *ERF113* or *ERF115* function mutants (*rap2.6l-1* and *erf115*,  
217 respectively) and observed no significant difference in this respect between them and wild-type  
218 controls (Figure 6A). As no loss-of-function T-DNA line for *ERF114* was available, we used  
219 CRISPR-Cas9 technology to delete a ca. 40 bp genomic fragment in the first exon of the  
220 *ERF114* gene in the *rap2.6l-1* and the *erf115* backgrounds to obtain *rap2.6l-1erf114C* and  
221 *erf115erf114C* double mutants, respectively (Supplemental Figure 3). Other multiple mutants  
222 were obtained by genetic crosses. Only the triple mutant *rap2.6l-1erf114Cerf115* produced  
223 significantly more ARs than wild-type controls (Figure 6A), indicating that *ERF113*, *ERF114*  
224 and *ERF115* act redundantly in the control of ARI.

225

### 226 ***ERF115* represses hypocotyl-derived AR initiation downstream of auxin**

227 Previous findings that *ERF115*'s expression is directly controlled by MYC2 and it plays major  
228 roles in root regeneration and stem cell replenishment (Heyman et al., 2013; Heyman et al.,  
229 2016; Zhou et al., 2019) prompted us to address its function during ARI. First, to overcome  
230 potential functional redundancy with other members of the family, we analyzed the  
231 *pERF115:ERF115:SRDX* line, which expresses a dominant negative variant of *ERF115*  
232 (because the *ERF115* coding sequence fused to the ethylene-responsive element binding factor-  
233 associated amphiphilic repression (EAR) domain is driven by the *ERF115* promoter to ensure  
234 repression in the native expression domain (Heyman et al., 2013). The  
235 *pERF115:ERF115:SRDX* line produced significantly more ARs than wild-type controls, but  
236 was very similar to the *rap2.6l-1erf114Cerf115* triple mutant (Figure 6A,B). Although we  
237 cannot exclude a potential contribution of other *ERF* genes, these findings suggest that *ERF113*,  
238 *ERF114* and *ERF115* are the main transcription factors involved in ARI. Interestingly, the  
239 overexpressing line *35S:ERF115* developed extremely few ARs (Figure 6B) but had only



240 slightly lower LR density than wild-type plants (Figure 6C and Supplemental Figure 4C,D).  
241 Thus, it phenocopied the *ninja-1myc2-322B* double mutant and confirmed that *ERF115* is an  
242 ARI repressor. We also characterized *ERF115*'s expression pattern during early ARI events  
243 using lines harboring the transcriptional fusion *pERF115:GUS* (Heyman et al., 2013). At T0,  
244 GUS staining was mainly detected in vascular tissues of the hypocotyl, and to a lesser extent in  
245 the root (Figure 6D). Exposing the seedlings to light for 24 h dramatically decreased the GUS  
246 signal (Figure 6D), suggesting that the *ERF115* gene is expressed in vascular tissue and its  
247 expression is negatively regulated by light, which we confirmed by qRT-PCR (Figure 6E).  
248 As JA acts downstream of auxin signaling in ARI inhibition (Gutierrez et al., 2012; Lakehal et  
249 al., 2019a), we hypothesized that the *35S:ERF115* line could be insensitive to exogenously  
250 applied auxin. To test this hypothesis, we treated *35S:ERF115*-expressing and wild-type pre-  
251 etiolated seedlings with the synthetic auxin naphthaleneacetic acid (NAA), and found that 1  
252  $\mu$ M NAA significantly enhanced AR development in the wild-type seedlings, but did not affect  
253 the *35S:ERF115*-expressing seedlings (Figure 6I-K). These data suggest that auxin cannot  
254 bypass the inhibitory effect of *ERF115* during ARI. Notably, the PR and LRs of the  
255 *35S:ERF115*-expressing seedlings were as sensitive as the wild-type roots to NAA (Figure  
256 6I,J). These data suggest that *ERF115* specifically activates and/or cooperates with other  
257 negative regulator(s) of ARI downstream of auxin signaling.

258

### 259 ***ERF115*-mediated ARI inhibition requires cytokinins (CKs)**

260 CKs, in balance with auxin, are known to promote shoot and callus formation but inhibit root  
261 growth and AR formation (Lakehal and Bellini, 2018; Ikeuchi et al., 2019), raising the  
262 possibility that modulation of the CK machinery by *ERF115* is involved in this  
263 multifunctionality. We confirmed the negative role of CKs in control of ARI as exogenously  
264 applied 6-benzyladenine (6-BA) inhibited the process in a dose-dependent manner (Figure 7A).  
265 We then analyzed the CK-deficient triple loss-of-function mutant *ipt3ipt5ipt7* that lacks three  
266 important ATP/ADP ISOPENTENYLTRANSFERASES catalyzing a rate-limiting step in *de*  
267 *novo* CK biosynthesis (Miyawaki et al., 2006), and a line overexpressing *CYOKININ*  
268 *OXIDASE1* (*35S:CKX1*), which is also deficient in CKs due to their enhanced  
269 degradation (Werner et al., 2003). Notably, both the triple loss-of-function mutant *ipt3ipt5ipt7*  
270 and the *35S:CKX1*-expressing line produced significantly more ARs than wild-type controls  
271 (Figure 7B,C). Similarly, the *arr1-3arr11-2* double mutant and *arr1-3arr11-2arr12-1* triple  
272 mutant, which lack the key type-B transcription factors ARR1, ARR11 and ARR12 involved

273 in CK signaling, produced significantly more ARs than wild-type plants (Figure 7D). These  
274 data genetically confirmed that CKs are repressors of ARI.

275 To test the hypothesis that *ERF115* inhibits ARI through CKs, we quantified relative amounts  
276 of transcripts of two CK-responsive genes, *ARR5* and *ARR7*, in etiolated hypocotyls of the  
277 overexpressing line *35S:ERF115* and wild-type controls at T0 and T24. Interestingly, at T0  
278 *ARR7* was upregulated, and at T24 both *ARR5* and *ARR7* were upregulated in the *35S:ERF115*  
279 line (Figure 7E). These findings suggest that CK responses are enhanced in hypocotyls of  
280 *35S:ERF115* plants, and to explore possible causes we quantified active CK bases at T0, T9  
281 and T24. At T0, isopentyladenine (iP), *trans*-Zeatin (*tZ*) and *cis*-Zeatin (*cZ*) contents of  
282 *35S:ERF115* and wild-type plants did not significantly differ (Figure 7F). However, at T9,  
283 *35S:ERF115* plants had significantly higher iP, *tZ* and *cZ* contents, and at T24 significantly  
284 higher iP and *cZ* contents than wild-type controls (Figure 7F). These data suggest that the  
285 *ERF115* inhibits ARI by modulating the CK pool. To test this hypothesis, we generated a  
286 *35S:ERF115ipt3ipt5ipt7* multiple mutant and a line overexpressing both *35S:ERF115* and  
287 *35S:CKX1* to deplete the CK pool in a *35S:ERF115* background, and confirmed that this was  
288 sufficient to restore ARI to wild-type levels in the *35S:ERF115* line (Figure 7G). These data  
289 indicate that *ERF115* inhibition of ARI is mediated by CKs. Interestingly, our transcriptomic  
290 data showed that several *LONELY GUY (LOG)* genes, which control a rate-limiting step in CK  
291 biosynthesis (Kuroha et al., 2009), were slightly upregulated, while several *CKX* genes were  
292 slightly downregulated, in the *ninja-1myc2-322B* double mutant (Supplemental Figure 5A,B).  
293 Altogether, our results strongly suggest that JA inhibits ARI by modulating CK homeostasis  
294 through the action of *ERF115*

295

## 296 DISCUSSION

297 Plants develop ARs in response to diverse intrinsic and/or extrinsic (stress-induced) cues  
298 (Bellini et al., 2014; Steffens and Rasmussen, 2016) that are perceived by competent cells and  
299 trigger extensive reprogramming that results in targeted cells acquiring new identities (Bellini  
300 et al., 2014; Lakehal and Bellini, 2018). The process has both high fundamental interest and  
301 practical importance as adventitious rooting is often a limiting step in clonal propagation.  
302 However, very little is known about the mechanism triggering the cell reprogramming that leads  
303 to ARI. Fortunately, intact hypocotyl-derived AR provide ideal model systems to unravel the  
304 signaling networks involved in this and other *de novo* organogenesis processes. We have  
305 previously shown that auxin controls ARI in Arabidopsis hypocotyls by modulating JA  
306 homeostasis (Gutierrez et al., 2009; Gutierrez et al., 2012; Lakehal et al., 2019a), but the JA  
307 signaling mechanism involved was not clear. Here, we provide detailed genetic and mechanistic  
308 insights into the JA signaling involved in ARI. Notably, *ninja-1* and *ninja-2* loss-of-function  
309 mutants produce ARs, albeit fewer than wild-type controls, and several lines of evidence  
310 indicate that this is possibly due to NINJA-independent repression of MYC-dependent  
311 machinery by a subset of JAZ proteins. For example, JAZ5, JAZ6, JAZ7 and JAZ8 can directly  
312 recruit TPL through their EAR motifs independently of NINJA (Kagale et al., 2010; Causier et  
313 al., 2012; Shyu et al., 2012), while JAZ1, JAZ3 and JAZ9 can directly recruit HISTONE  
314 DEACETYLASE6 (HDA6) (Zhu et al., 2011), which participates in repression of various JA-  
315 induced genes' expression (Zhu et al., 2011). In addition, yeast two-hybrid experiments have  
316 shown that JAZ7, JAZ8 and JAZ13 do not interact with NINJA (Pauwels et al., 2010; Shyu et  
317 al., 2012; Thireault et al., 2015), and the Jasmonate-associated (Jas) domain of JAZ directly  
318 binds to the region containing the JAZ-interaction domain (JID) and TAD domains of MYC2,  
319 MYC3 or MYC4 (Zhang et al., 2015). Moreover, MED25 (one of 29 subunits of the  
320 MEDIATOR complex) interacts with MYC proteins and recruits the RNA polymerase II-  
321 dependent transcriptional machinery at MYC-target genes (Chen et al., 2012; An et al., 2017).  
322 MED25 directly interacts with the TAD domain of MYCs, raising the possibility that it competes  
323 with JAZ proteins for access to the TAD domain (Zhang et al., 2015). All these findings suggest  
324 that some JAZ proteins might block transcriptional activities of MYC transcription factors  
325 involved in ARI in a NINJA-independent manner. Further research is needed to decipher the  
326 JAZ-dependent JA perception machinery involved in ARI. For this, combining mutants with  
327 potentially complementary functionalities, and/or potentially informative expression patterns,  
328 may be more illuminating than generating higher-order multiple mutants based on phylogenetic  
329 relationships.

330

331 Our results indicate that MYC-mediated JA signaling inhibits ARI in both NINJA-dependent  
332 and -independent manners. Both pathways act synergistically in control of the JA response, as  
333 indicated by the much lower numbers of ARs produced by *ninjamyc2-322B* double mutants  
334 than the parental lines (*ninja* and *myc2-322B*) and wild-type controls. Therefore, the strong  
335 phenotype of *ninjamyc2-322B* double mutants may be due to de-repression of not only MYC2,  
336 MYC3 and MYC4, but also other NINJA-bound transcription factors (if any). Interestingly,  
337 this de-repression results in constitutively enhanced JA signaling. Accordingly, our  
338 transcriptomic analysis revealed that most of the JAZ genes, which are JA response marker  
339 genes (Chini et al., 2007), were highly and constitutively upregulated in *ninja-1myc2-322B*  
340 plants throughout the covered developmental stages. Our results are consistent with previous  
341 report suggesting that MYC2 controls root expansion in NINJA dependent and -independent  
342 manners (Gasperini et al., 2015).

343 For many years JA was regarded as a solely stress-related plant hormone, but more recently  
344 JA signaling has been implicated in several organogenesis and regenerative processes (Asahina  
345 et al., 2011; Gutierrez et al., 2012; Lakehal et al., 2019a; Zhang et al., 2019; Zhou et al., 2019),  
346 and attempts to identify its downstream targets have begun. Although its role in adventitious  
347 rooting seems to be species- and context-dependent (Lakehal and Bellini, 2018), our results  
348 indicate that the *ERF115* gene is likely one of the targets acting downstream of JA in this  
349 process. This conclusion is strongly supported by the recent finding that MYC2 induces  
350 expression of *ERF115* by directly binding its promoter (Zhou et al., 2019). The *ERF115* acts  
351 redundantly with its closely-related paralogs *ERF113* and *ERF114*, which have also been  
352 implicated in several organogenesis and regenerative processes (Heyman et al., 2018). Here we  
353 provide evidence that *ERF115*-mediated ARI inhibition involves modulation of the CK  
354 machinery. Physiological approaches have shown that CKs inhibit ARI in several plant species  
355 and model systems (Lakehal and Bellini, 2018). In this study, we genetically demonstrated that  
356 depleting CKs by either blocking their biosynthesis or enhancing their degradation restores the  
357 ARI wild-type phenotype in an *ERF115*-overexpressing line, confirming that *ERF115* represses  
358 ARI through CK signaling. Interestingly, the *ERF115* promoter contains a cytokinin-responsive  
359 motif, and a yeast one-hybrid screen has shown that ARR1 and ARR20 bind to the promoter of  
360 *ERF115* (Ikeuchi et al., 2018). Although direct evidence is needed, these data suggest that  
361 cytokinin signaling may also control the abundance of *ERF115* transcripts. The role of this  
362 feedback loop in adventitious rooting, if any, awaits further investigation.

## 363 MATERIALS AND METHODS

364

### 365 Plant material

366 The quadruple mutant *jaz7jaz8jaz10jaz13* (Thireault et al., 2015) and quintuple mutant  
367 *jaz1jaz3jaz4jaz9jaz10* (Campos et al., 2016) were provided by G. Howe (Michigan State  
368 University, USA). The single mutants *ninja-1*, *ninja-2* (Acosta et al., 2013), and *myc2-322B* as  
369 well as the double mutants *ninja-1myc2-322B*, *ninja-2myc2-322B* and *ninja-1atr2D* (Gasperini  
370 et al., 2015) were provided by E.E. Farmer (University of Lausanne, Switzerland). The gain of  
371 function allele of *MYC3* (*atr2D*) (Smolen et al., 2002) was provided by J. Bender (Brown  
372 University, Rhode Island, USA). The single mutant *erf115* (SALK\_021981) and transgenic  
373 lines *pERF115:ERF115:SRDX*, and *35S:ERF115* (Heyman et al., 2013) were provided by L.  
374 De Veylder (VIB, University of Gent, Belgium). The *rap2-6l-1* mutant (SALK\_051006) (Che  
375 et al., 2006), *arr1-3arr11-2* (N6980) and *arr1-3arr11-2 arr12-1* (N6986) were provided by the  
376 Nottingham Arabidopsis Stock Centre. The transgenic line *35S:CKXI* (Werner et al., 2003) and  
377 triple mutant *ipt3ipt5ipt7* (Miyawaki et al., 2006) were provided by T. Schmölling (Freie  
378 Universität Berlin, Germany). E.E. Farmer and L. De Veylder also respectively provided the  
379 reporter lines *pMYC2:GUSplus*, *pNINJA:GUSplus* and *pNINJA:NINJA:mCITRINE/ninja-1*  
380 (Gasperini et al., 2015) and *pERF115:GUS* (Heyman et al., 2013).

381

### 382 CRISPR-Cas9 cloning, transformation and mutant screening

383 To generate the loss-of-function allele *erf114C*, two guide RNAs (*ERF114\_F* and *ERF114\_R*,  
384 see Supplemental Table 2) were designed, as previously described (Lakehal et al., 2019b), to  
385 target the *ERF114* gene's first exon (Supplemental Figure 3). The guide RNAs were then cloned  
386 into the binary vector pHEE401E, the resulting construct was transformed into *Escherichia coli*  
387 cells, and the positive clones were selected by PCR, then confirmed by sequencing, following  
388 previous protocols (Xing et al., 2014; Wang et al., 2015). The *Agrobacterium*-mediated floral  
389 dip method (Clough and Bent, 1998) was used to transform the construct into *rap2-6l-1* or  
390 *erf115* mutants. T1 seedlings were screened on Arabidopsis growth medium (Lakehal et al.,  
391 2019b) containing 50 µg/ml hygromycin and surviving seedlings were genotyped for deletions  
392 in *ERF114* using primers listed in Supplemental Table 2. Several independent homozygous and  
393 heterozygous T1 lines were identified. Only homozygous *erf114C* and Cas9-free lines,  
394 confirmed by examination of T2 individuals and Cas9-construct genotyping (Xing et al., 2014;  
395 Wang et al., 2015), were used for further analysis.

396

397

### 398 **Tissue-specific complementation: cloning, transformation and transgenic line screening**

399 The pEN-L4-pGATA23-R1 and pEN-L4-pXPP-R1 plasmids (De Rybel et al., 2010) (Andersen  
400 et al., 2018) were gifts from T. Beeckman (VIB, Gent, Belgium) and J. Vermeer (University of  
401 Zurich, Switzerland), respectively. Plasmids carrying coding sequences of the *NINJA* gene,  
402 pEN-L1-NINJA(noSTOP)-L2, and reporter protein, pEN-R2-mCITRINE-L3 (Gasperini et al.,  
403 2015), were gifts from E.E. Framer (University of Lausanne, Switzerland). To generate  
404 promoter:NINJA:CT fusion protein constructs, the pEN-L4-promoter-R1, pEN-L1-  
405 NINJA(noSTOP)-L2 and pEN-R2-mCITRINE-L3 were recombined into the pB7m34gw  
406 vector using LR clonaseII plus (Invitrogen) according to the manufacturer's instructions. All  
407 the expression vectors were confirmed by colony PCR and sequencing, then transformed into  
408 GV3101 *Agrobacterium tumefaciens* cells, which were used to transform *ninja-1myc2-332B*  
409 double mutants using the floral dip method (Clough and Bent, 1998). Single-copy, homozygous  
410 lines were selected by cultivating representatives of T2 and T3 generations on Arabidopsis  
411 medium (Lakehal et al., 2019b) supplemented with 10 µg/ml DL-phosphinothricin (Duchefa  
412 biochemie). At least two lines carrying each construct showing the same phenotype were further  
413 characterised.

414

### 415 **Growth conditions and root (adventitious and lateral) phenotyping**

416 Previously described adventitious rooting conditions (Sorin et al., 2005; Gutierrez et al., 2009;  
417 Gutierrez et al., 2012; Lakehal et al., 2019a) were applied in all the experiments. Seedlings  
418 were etiolated in the dark until the hypocotyls were approximately 6-7 mm long, then were  
419 grown in long-day conditions (16 h light 22° C/ 8h dark 17° C cycles, with 130-140 µmol  
420 photons/m<sup>2</sup>/sec during light phases and constant 65% relative humidity). After 7 days, numbers  
421 of primordia and emerged ARs were counted under a binocular stereomicroscope. Numbers of  
422 visible LRs were also counted, and the primary root length was measured using ImageJ software  
423 (Schindelin et al., 2012). The LR density was calculated by dividing the number of LR by the  
424 primary root length.

425

### 426 **RNA isolation and cDNA synthesis**

427 Total RNA was prepared using a RNAqueous® Total RNA Isolation kit (Ambion™). Portions  
428 (4 µg) of the resulting RNA preparations were treated with DNaseI using a DNAfree Kit  
429 (Ambion™) then cDNA was synthesized by reverse transcription using a SuperScript II



430 Reverse transcriptase kit (Invitrogen) with anchored-oligo(dT)<sub>18</sub> primers, according to the  
431 manufacturer's instructions.

432

### 433 **Quantitative RT-PCR (qRT-PCR) experiments**

434 Transcript levels were assessed by qRT-PCR, in assays with triplicate reaction mixtures (final  
435 volume, 20  $\mu$ L) containing 5  $\mu$ L of cDNA, 0.5  $\mu$ M of both forward and reverse primers, and 1 $\times$   
436 LightCycler 480 SYBR Green I Master (Roche) using a LightCycler 480 instrument (Roche)  
437 according to the manufacturer's instructions. A melting curve analytical step was added to each  
438 PCR program. The sequences of primers used for all target genes are presented in Supplemental  
439 Table 2. The crossing threshold (CT) values for each sample were acquired with the  
440 LightCycler 480 software (Roche) using the second derivative maximum method. All  
441 quantifications were repeated with at least two independent biological replicates.

442

### 443 **qRT-PCR data analysis**

444 Reference genes were validated as the most stably expressed genes in our experimental  
445 procedures (Gutierrez et al., 2009) using GenNorm software and the most stable two (*TIP41*  
446 and *EF1A*) were used to normalize the quantitative qPCR data. The data obtained using both  
447 reference genes were similar and only data obtained using *TIP41* are presented here. Relative  
448 transcript amounts were calculated as previously described (Gutierrez et al., 2009), and  
449 considered significant if fold differences were  $\geq 1.5$  with  $p$ -values  $\leq 0.05$ .

450

### 451 **RNA sequencing and transcriptomic analysis**

452 Total RNA was extracted from etiolated hypocotyls grown in darkness at T0, just before  
453 exposure of some of the etiolated seedlings to light. Further samples were collected after 9 and  
454 24 h in long-day conditions (T9L and T24L, respectively). In each case three biological  
455 replicates were prepared, and the total RNA was treated with DNaseI using a DNAfree Kit  
456 (Ambion<sup>TM</sup>) to remove any contaminating DNA. The RNA's integrity and quantity were  
457 checked using a 2100 Bioanalyzer (Agilent), then it was sequenced by BGI Tech (China) using  
458 an Illumina HiSeq 4000 platform. The reads were trimmed with SOAPnuke then clean reads  
459 were mapped to the Araport11 reference sequence using Bowtie2 (Langmead and Salzberg,  
460 2012). Gene expression was quantified using RSEM (RNA-Seq by Expectation-Maximization)  
461 (Li and Dewey, 2014) and differentially expressed genes (DEGs) between *ninja-1myc2-322B*  
462 and wild-type plants at selected time points were detected using NOISeq software (Tarazona et  
463 al., 2011) with fold change  $\geq 2$  and probability 0.8 settings.



464 FIMO tools were used, via the <http://meme-suite.org/tools/fimo> web interface, to scan  
465 promoters (1 Kb upstream of ATG translation start codons) of the DEGs for G box and G-box-  
466 like motifs with a 1E-4 *p*-value setting.

467

### 468 **Spatiotemporal gene expression patterns during AR initiation**

469 The spatiotemporal patterns of *NINJA*, *MYC2* and *ERF115* genes' expression during AR  
470 initiation were monitored by GUS-based analysis, as follows. Seedlings expressing  
471 *pNINJA:GUSplus*, *pMYC2:GUSplus* or *pERF115:GUS* were grown in AR-inducing conditions  
472 as described above, then stained with X-GLCA (Duchefa Biochemie, X1405.1000) as  
473 previously described (Sorin et al., 2005). At least 25 seedlings of each genotype sampled at  
474 each time point were stained, and one representative seedling of each set was photographed.

475

### 476 **Sample preparation for hormone quantification**

477 Hypocotyls were collected from seedlings grown in AR-inducing conditions as described  
478 above. The hypocotyls were quickly dried on tissue paper then frozen in liquid nitrogen.  
479 Samples were prepared from six biological replicates.

480

### 481 **Quantification of *cis*-OPDA, JA and JA-Ile**

482 Endogenous levels of jasmonates (*cis*-OPDA, free JA, and JA-Ile) were determined in 20 mg  
483 samples, as previously described (Floková et al., 2014).

484

### 485 **Quantification of endogenous cytokinin bases**

486 Cytokinin metabolites were quantified following published methodology (Svačinová et al.,  
487 2012; Antoniadis et al., 2015) Briefly, samples (20 mg FW) were homogenized and extracted in  
488 1 ml of modified Bielecki solvent (60% MeOH, 10% HCOOH and 30% H<sub>2</sub>O) together with a  
489 cocktail of stable isotope-labelled internal standards (0.25 pmol of CK bases added per sample).  
490 The extracts were applied to an Oasis MCX column (30 mg/ml, Waters) conditioned with 1 ml  
491 each of 100% MeOH and H<sub>2</sub>O, equilibrated sequentially with 1 ml of 50% (v/v) nitric acid, 1  
492 ml of H<sub>2</sub>O, and 1 ml of 1 M HCOOH, then washed with 1 ml of 1 M HCOOH and 1 ml 100%  
493 MeOH. Analytes were then eluted in two steps with 1 ml of 0.35 M aqueous NH<sub>4</sub>OH solution  
494 and 2 ml of 0.35 M NH<sub>4</sub>OH in 60% (v/v) MeOH solution, evaporated to dryness *in vacuo* and  
495 stored at -20°C. Cytokinin levels were determined by ultra-high performance liquid  
496 chromatography-electrospray tandem mass spectrometry (UHPLC-MS/MS) using stable

497 isotope-labelled internal standards as reference compounds (Rittenberg D., 1940). Following  
498 separation with an Acquity UPLC<sup>®</sup> system (Waters, Milford, MA, USA) equipped with an  
499 Acquity UPLC BEH Shield RP18 column (150x2.1 mm dimensions, 1.7 µm particles; Waters),  
500 the effluent was introduced into the electrospray ion source of a Xevo<sup>™</sup> TQ-S MS triple  
501 quadrupole mass spectrometer (Waters). Six independent biological replicates of each genotype  
502 sampled at each time point were analyzed.

503

#### 504 **Confocal Laser Scanning Microscopy (cLSM) analysis**

505 Images of the vasculature in *Arabidopsis* hypocotyls at depths up to 150 µm from the epidermal  
506 surface were acquired using a Zeiss LSM880 inverted confocal laser scanning microscope (Carl  
507 Zeiss GmbH, Oberkochen, Germany) equipped with a C-Achroplan 32x/0.85 W Corr M27 lens.  
508 The seedlings were etiolated in the dark until their hypocotyls were 6-7 mm long then incubated  
509 in liquid medium containing 30 µg/ml propidium iodide (PI) as a cell wall counter-stain to  
510 identify the cell layers, and observed while still alive, mounted with the same medium. The PI  
511 was excited using a 561 nm laser while expressed reporter protein (mCITRINE) was excited  
512 with a 488 nm Argon laser, using a MBS 488/561 Main Beam Splitter. PI Fluorescence from  
513 PI and the reporter (mCITRINE) were detected to localize expression with a photomultiplier  
514 tube (PMT) detector and a GaAsP (gallium arsenide phosphide photomultiplier tube) 32-  
515 channels spectral detector (with about two times higher sensitivity than the PMT, enabling  
516 detection of even poorly expressed reporters), respectively. 3D projections and orthogonal  
517 views were generated using FIJI/Image J (Schindelin et al., 2012), including image-wide  
518 adjustments of brightness and contrast for each channel before merging to ensure that both  
519 signals from PI and the fluorescent protein reporter could be easily seen in all displayed images.

520

521

522

523

524

525

526

527

528

529

530

531 **FUNDING**

532 This work was supported by grants from the Swedish Research Council (VR), the Swedish  
533 Research Council for Research and Innovation for Sustainable Growth (VINNOVA), the K &  
534 A Wallenberg Foundation, the Carl Trygger Foundation, and the Carl Kempe Foundation  
535 awarded to C.B, together with grants from the Ministry of Education, Youth and Sports of the  
536 Czech Republic (European Regional Development Fund-Project “Plants as a tool for  
537 sustainable global development” No. CZ.02.1.01/0.0/0.0/16\_019/0000827), and the Czech  
538 Science Foundation (Project No. 19-00973S) awarded to O.N.

539

540 **ACKNOWLEDGMENTS**

541 The authors sincerely thank Hana Martínková and Petra Amakorová for their help with  
542 phytohormone analyses, Nicolas Delhomme and Iryna Shutava from the UPSC bioinformatic  
543 platform for their advice and help with the RNA-Seq data analysis and *cis*-regulatory motif  
544 search.

545

546 **AUTHORS' CONTRIBUTIONS**

547 Methodology, A.L., C.B., A.D. Investigation, A.L., A.D., Z.R., S.A., S.E., O.N.  
548 Writing – original Draft, A.L., A.D. Writing –Review & Editing, A.L., C.B.;  
549 Conceptualization, A.L. C.B.; Supervision, C.B.; Funding Acquisition, C.B., H.T.,  
550 O.N. and M.S.

551

552 **REFERENCES**

- 553 **Acosta, I. F., Gasperini, D., Chételat, A., Stolz, S., Santuari, L., and Farmer, E. E.**  
554 (2013). Role of NINJA in root jasmonate signaling. *Proc. Natl. Acad. Sci. U S A*  
555 **110**:15473–15478.
- 556 **An, C., Li, L., Zhai, Q., You, Y., Deng, L., Wu, F., Chen, R., Jiang, H., Wang, H., Chen,**  
557 **Q., et al.** (2017). Mediator subunit MED25 links the jasmonate receptor to  
558 transcriptionally active chromatin. *Proc. Natl. Acad. Sci. U S A* **114**:E8930–E8939.
- 559 **Andersen, T. G., Naseer, S., Ursache, R., Wybouw, B., Smet, W., De Rybel, B., Vermeer,**  
560 **J. E. M., and Geldner, N.** (2018). Diffusible repression of cytokinin signalling produces  
561 endodermal symmetry and passage cells. *Nature* **555**:529–533.
- 562 **Antoniadi, I., Plačková, L., Simonovik, B., Doležal, K., Turnbull, C., Ljung, K., and**  
563 **Novák, O.** (2015). Cell-type-specific cytokinin distribution within the arabidopsis  
564 primary root apex. *Plant Cell* **27**:1955–1967.
- 565 **Asahina, M., Azuma, K., Pitaksaringkarn, W., Yamazaki, T., Mitsuda, N., Ohme-**  
566 **Takagi, M., Yamaguchi, S., Kamiya, Y., Okada, K., Nishimura, T., et al.** (2011).  
567 Spatially selective hormonal control of RAP2.6L and ANAC071 transcription factors  
568 involved in tissue reunion in Arabidopsis. *Proc. Natl. Acad. Sci. U S A* **108**:16128–  
569 16132.
- 570 **Bellini, C., Pacurar, D. I., and Perrone, I.** (2014). Adventitious Roots and Lateral Roots:  
571 Similarities and Differences. *Annu. Rev. Plant Biol.* **65**:639–666.
- 572 **Campos, M. L., Yoshida, Y., Major, I. T., De Oliveira Ferreira, D., Weraduwage, S. M.,**  
573 **Froehlich, J. E., Johnson, B. F., Kramer, D. M., Jander, G., Sharkey, T. D., et al.**  
574 (2016). Rewiring of jasmonate and phytochrome B signalling uncouples plant growth-  
575 defense tradeoffs. *Nat. Commun.* **7**:1–10.
- 576 **Causier, B., Ashworth, M., Guo, W., and Davies, B.** (2012). The TOPLESS interactome: A  
577 framework for gene repression in Arabidopsis. *Plant Phys.* **158**:423–438.
- 578 **Che, P., Lall, S., Nettleton, D., and Howell, S. H.** (2006). Gene expression programs during  
579 shoot, root, and callus development in Arabidopsis tissue culture. *Plant Phys.* **141**:620–  
580 637.
- 581 **Chen, R., Jiang, H., Li, L., Zhai, Q., Qi, L., Zhou, W., Liu, X., Li, H., Zheng, W., Sun, J.,**  
582 **et al.** (2012). The arabidopsis Mediator subunit MED25 differentially regulates  
583 jasmonate and abscisic acid signaling through interacting with the MYC2 and ABI5  
584 transcription factors. *Plant Cell* **24**:2898–2916.
- 585 **Chini, A., Fonseca, S., Fernández, G., Adie, B., Chico, J. M., Lorenzo, O., García-**

- 586 **Casado, G., López-Vidriero, I., Lozano, F. M., Ponce, M. R., et al.** (2007). The JAZ  
587 family of repressors is the missing link in jasmonate signalling. *Nature* **448**:666–671.
- 588 **Chini, A., Gimenez-Ibanez, S., Goossens, A., and Solano, R.** (2016). Redundancy and  
589 specificity in jasmonate signalling. *Curr. Opin. Plant Biol.* **33**:147–156.
- 590 **Clough, S. J., and Bent, A. F.** (1998). Floral dip: A simplified method for *Agrobacterium*-  
591 mediated transformation of *Arabidopsis thaliana*. *Plant J.* **16**:735–743.
- 592 **De Rybel, B., Vassileva, V., Parizot, B., Demeulenaere, M., Grunewald, W., Audenaert,  
593 D., Van Campenhout, J., Overvoorde, P., Jansen, L., Vanneste, S., et al.** (2010). A  
594 novel Aux/IAA28 signaling cascade activates GATA23-dependent specification of  
595 lateral root founder cell identity. *Curr. Biol.* **20**:1697–1706.
- 596 **Floková, K., Tarkowská, D., Miersch, O., Strnad, M., Wasternack, C., and Novák, O.**  
597 (2014). UHPLC-MS/MS based target profiling of stress-induced phytohormones.  
598 *Phytochemistry* **105**:147–157.
- 599 **Fonseca, S., Chini, A., Hamberg, M., Adie, B., Porzel, A., Kramell, R., Miersch, O.,  
600 Wasternack, C., and Solano, R.** (2009). (+)-7-iso-Jasmonoyl-L-isoleucine is the  
601 endogenous bioactive jasmonate. *Nat. Chem. Biol.* **5**:344–350.
- 602 **Gasperini, D., Chételat, A., Acosta, I. F., Goossens, J., Pauwels, L., Goossens, A., Dreos,  
603 R., Alfonso, E., and Farmer, E. E.** (2015). Multilayered Organization of Jasmonate  
604 Signalling in the Regulation of Root Growth. *PLoS Genet.* **11**:1–27.
- 605 **Godoy, M., Franco-Zorrilla, J. M., Pérez-Pérez, J., Oliveros, J. C., Lorenzo, Ó., and  
606 Solano, R.** (2011). Improved protein-binding microarrays for the identification of DNA-  
607 binding specificities of transcription factors. *Plant J.* **66**:700–711.
- 608 **Guo, Q., Yoshida, Y., Major, I. T., Wang, K., Sugimoto, K., Kapali, G., Havko, N. E.,  
609 Benning, C., and Howe, G. A.** (2018). JAZ repressors of metabolic defense promote  
610 growth and reproductive fitness in *Arabidopsis*. *Proc. Natl. Acad. Sci. U S A*  
611 **115**:E10768–E10777.
- 612 **Gutierrez, L., Bussell, J. D., Pacurar, D. I., Schwambach, J., Pacurar, M., and Bellini, C.**  
613 (2009). Phenotypic Plasticity of Adventitious Rooting in *Arabidopsis* Is Controlled by  
614 Complex Regulation of AUXIN RESPONSE FACTOR Transcripts and MicroRNA  
615 Abundance. *Plant Cell* **21**:3119–3132.
- 616 **Gutierrez, L., Mongelard, G., Floková, K., Păcurar, D. I., Novák, O., Staswick, P.,  
617 Kowalczyk, M., Păcurar, M., Demailly, H., Geiss, G., et al.** (2012). Auxin Controls  
618 *Arabidopsis* Adventitious Root Initiation by Regulating Jasmonic Acid Homeostasis.  
619 *Plant Cell* **24**:2515–2527.

- 620 **Heyman, J., Cools, T., Vandenbussche, F., Heyndrickx, K. S., Van Leene, J.,**  
621 **Vercauteren, I., Vanderauwera, S., Vandepoele, K., De Jaeger, G., Van Der**  
622 **Straeten, D., et al. (2013).** ERF115 controls root quiescent center cell division and stem  
623 cell replenishment. *Science* **342**:860–863.
- 624 **Heyman, J., Cools, T., Canher, B., Shavialenka, S., Traas, J., Vercauteren, I., Van Den**  
625 **Daele, H., Persiau, G., De Jaeger, G., Sugimoto, K., et al. (2016).** The heterodimeric  
626 transcription factor complex ERF115-PAT1 grants regeneration competence. *Nat. Plants*  
627 **2**:1–7.
- 628 **Heyman, J., Canher, B., Bisht, A., Christiaens, F., and De Veylder, L. (2018).** Emerging  
629 role of the plant ERF transcription factors in coordinating wound defense responses and  
630 repair. *J. Cell Sci.* **131**:1-8
- 631 **Ikeuchi, M., Iwase, A., Rymen, B., Lambolez, A., Kojima, M., Takebayashi, Y., Heyman,**  
632 **J., Watanabe, S., Seo, M., De Veylder, L., et al. (2017).** Wounding triggers callus  
633 formation via dynamic hormonal and transcriptional changes. *Plant Phys.* **175**:1158–  
634 1174.
- 635 **Ikeuchi, M., Shibata, M., Rymen, B., Iwase, A., Bgman, A. M., Watt, L., Coleman, D.,**  
636 **Favero, D. S., Takahashi, T., Ahnert, S. E., et al. (2018).** A Gene Regulatory Network  
637 for Cellular Reprogramming in Plant Regeneration. *Plant Cell Physiol.* **59**:765–777.
- 638 **Ikeuchi, M., Favero, D. S., Sakamoto, Y., Iwase, A., Coleman, D., Rymen, B., and**  
639 **Sugimoto, K. (2019).** Molecular Mechanisms of Plant Regeneration. *Annu. Rev. Plant*  
640 *Biol.* **70**:377–406.
- 641 **Kagale, S., Links, M. G., and Rozwadowski, K. (2010).** Genome-wide analysis of ethylene-  
642 responsive element binding factor-associated amphiphilic repression motif-containing  
643 transcriptional regulators in arabidopsis. *Plant Phys.* **152**:1109–1134.
- 644 **Kong, X., Tian, H., Yu, Q., Zhang, F., Wang, R., Gao, S., Xu, W., Liu, J., Shani, E., Fu,**  
645 **C., et al. (2018).** PHB3 Maintains Root Stem Cell Niche Identity through ROS-  
646 Responsive AP2/ERF Transcription Factors in Arabidopsis. *Cell Rep.* **22**:1350–1363.
- 647 **Kumar S., Stecher G., Li M., Knyaz C., and Tamura K. (2018).** MEGA X: Molecular  
648 Evolutionary Genetics Analysis across computing platforms. *Mol. Biol. Evol.* **35**:1547-  
649 1549.
- 650 **Kuroha, T., Tokunaga, H., Kojima, M., Ueda, N., Ishida, T., Nagawa, S., Fukuda, H.,**  
651 **Sugimoto, K., and Sakakibara, H. (2009).** Functional analyses of LONELY GUY  
652 cytokinin-activating enzymes reveal the importance of the direct activation pathway in  
653 Arabidopsis. *Plant Cell* **21**:3152–3169.

- 654 **Lakehal, A., and Bellini, C.** (2018). Control of adventitious root formation: insights into  
655 synergistic and antagonistic hormonal interactions. *Physiol Plant.* **165**:90–100.
- 656 **Lakehal, A., Chaabouni, S., Cavel, E., Le Hir, R., Ranjan, A., Raneshan, Z., Novák, O.,**  
657 **Păcurar, D. I., Perrone, I., Jobert, F., et al.** (2019a). A Molecular Framework for the  
658 Control of Adventitious Rooting by TIR1/AFB2-Aux/IAA-Dependent Auxin Signaling  
659 in Arabidopsis. *Mol. Plant* **12**:1499–1514.
- 660 **Lakehal, A., Dob, A., Novák, O., and Bellini, C.** (2019b). A DAO1-Mediated Circuit  
661 Controls Auxin and Jasmonate Crosstalk Robustness during Adventitious Root Initiation  
662 in Arabidopsis. *Int. J. Mol. Sci.* **20**:4428.
- 663 **Lakehal, A., Ranjan, A., and Bellini, C.** (2020). Multiple Roles of Jasmonates in Shaping  
664 Rhizotaxis: Emerging Integrators. In: Champion A., Laplaze L. (eds) *Jasmonate in Plant*  
665 *Biology.* *Methods Mol. Biol., Humana, New York, NY* **2085**:3–22.
- 666 **Langmead, B., and Salzberg, S. L.** (2012). Fast gapped-read alignment with Bowtie 2. *Nat.*  
667 *Methods* **9**:357–359.
- 668 **Li, B., and Dewey, C. N.** (2014). RSEM: Accurate transcript quantification from RNA-seq  
669 data with or without a reference genome. *BMC Bioinformatics* **12**:41–74.
- 670 **Mehrnia, M., Balazadeh, S., Zanor, M. I., and Mueller-Roeber, B.** (2013). EBE, an  
671 AP2/ERF transcription factor highly expressed in proliferating cells, affects shoot  
672 architecture in Arabidopsis. *Plant Phys.* **162**:842–857.
- 673 **Miyawaki, K., Tarkowski, P., Matsumoto-Kitano, M., Kato, T., Sato, S., Tarkowska, D.,**  
674 **Tabata, S., Sandberg, G., and Kakimoto, T.** (2006). Roles of Arabidopsis ATP/ADP  
675 isopentenyltransferases and tRNA isopentenyltransferases in cytokinin biosynthesis.  
676 *Proc. Natl. Acad. Sci. U S A* **103**:16598–16603.
- 677 **Nakano, T., Suzuki, K., Fujimura, T., and Shinshi, H.** (2006). Genome-wide analysis of  
678 the ERF gene family in arabidopsis and rice. *Plant Phys.* **140**:411–432.
- 679 **Pauwels, L., Barbero, G. F., Geerinck, J., Tilleman, S., Grunewald, W., Pérez, A. C.,**  
680 **Chico, J. M., Bossche, R. Vanden, Sewell, J., Gil, E., et al.** (2010). NINJA connects  
681 the co-repressor TOPLESS to jasmonate signalling. *Nature* **464**:788–791.
- 682 **Rittenberg D., Foster. G. L.** (1940). A new procedure for quantitative analysis by Isotope  
683 dilution, with application to the determination of amino acids and fatty acids. *J. Biol.*  
684 *Chem.* **133**:737–744.
- 685 **Schindelin, J., Arganda-Carreras, I., Frise, E., Kaynig, V., Longair, M., Pietzsch, T.,**  
686 **Preibisch, S., Rueden, C., Saalfeld, S., Schmid, B., et al.** (2012). Fiji: an open-source  
687 platform for biological-image analysis. *Nat. methods* **9**:676–82.



- 688 **Sheard, L. B., Tan, X., Mao, H., Withers, J., Ben-Nissan, G., Hinds, T. R., Kobayashi,**  
689 **Y., Hsu, F. F., Sharon, M., Browse, J., et al.** (2010). Jasmonate perception by inositol-  
690 phosphate-potentiated COI1-JAZ co-receptor. *Nature* **468**:400–407.
- 691 **Shyu, C., Figueroa, P., DePew, C. L., Cooke, T. F., Sheard, L. B., Moreno, J. E., Katsir,**  
692 **L., Zheng, N., Browse, J., and Howe, G. A.** (2012). JAZ8 Lacks a Canonical Degron  
693 and Has an EAR Motif That Mediates Transcriptional Repression of Jasmonate  
694 Responses in Arabidopsis. *Plant Cell* **24**:536–550.
- 695 **Smolen, G. A., Pawlowski, L., Wilensky, S. E., and Bender, J.** (2002). Dominant alleles of  
696 the basic helix-loop-helix transcription factor ATR2 activate stress-responsive genes in  
697 arabidopsis. *Genetics* **161**:1235–1246.
- 698 **Sorin, C., Bussell, J. D., Camus, I., Ljung, K., Kowalczyk, M., Geiss, G., McKhann, H.,**  
699 **Garcion, C., Vaucheret, H., Sandberg, G., et al.** (2005). Auxin and Light Control of  
700 Adventitious Rooting in Arabidopsis. *Plant Cell* **17**:1343–1359.
- 701 **Staswick, P. E., Sut, W., and Howell, S. H.** (1992). Methyl jasmonate inhibition of root  
702 growth and induction of a leaf protein are decreased in an Arabidopsis thaliana mutant.  
703 *Proc. Natl. Acad. Sci. USA* **89**:6837–6840.
- 704 **Steffens, B., and Rasmussen, A.** (2016). The Physiology of Adventitious Roots. *Plant Phys.*  
705 **170**:603–617.
- 706 **Sukumar, P., Maloney, G. S., and Muday, G. K.** (2013). Localized Induction of the ATP-  
707 Binding Cassette B19 Auxin Transporter Enhances Adventitious Root Formation in  
708 Arabidopsis. *Plant Phys.* **162**:1392–1405.
- 709 **Svačinová, J., Novák, O., Plačková, L., Lenobel, R., Holík, J., Strnad, M., and Doležal,**  
710 **K.** (2012). A new approach for cytokinin isolation from Arabidopsis tissues using  
711 miniaturized purification: pipette tip solid-phase extraction. *Plant Methods* **8**:1–14.
- 712 **Tarazona S., Garcia-Alcalde F., Dopazo J., Ferrer A., and Conesa A.** (2011). Differential  
713 expression in RNA-seq: A matter of depth. *Genome Res.* **21**:2213–2223.
- 714 **Thines, B., Katsir, L., Melotto, M., Niu, Y., Mandaokar, A., Liu, G., Nomura, K., He, S.**  
715 **Y., Howe, G. A., and Browse, J.** (2007). JAZ repressor proteins are targets of the  
716 SCFCOI1 complex during jasmonate signalling. *Nature* **448**:661–665.
- 717 **Thireault, C., Shyu, C., Yoshida, Y., St. Aubin, B., Campos, M. L., and Howe, G. A.**  
718 (2015). Repression of jasmonate signaling by a non-TIFY JAZ protein in Arabidopsis.  
719 *Plant J.* **82**:669–679.
- 720 **Wang, Z. P., Xing, H. L., Dong, L., Zhang, H. Y., Han, C. Y., Wang, X. C., and Chen, Q.**  
721 **J.** (2015). Egg cell-specific promoter-controlled CRISPR/Cas9 efficiently generates

- 722 homozygous mutants for multiple target genes in Arabidopsis in a single generation.  
723 *Genome Biol.* **16**:1–12.
- 724 **Wasternack, C., and Hause, B.** (2013). Jasmonates: Biosynthesis, perception, signal  
725 transduction and action in plant stress response, growth and development. An update to  
726 the 2007 review in *Annals of Botany. Ann. Bot.* **111**:1021–1058.
- 727 **Werner, T., Motyka, V., Laucou, V., Smets, R., Van Onckelen, H., and Schmülling, T.**  
728 (2003). Cytokinin-Deficient Transgenic Arabidopsis Plants Show Multiple  
729 Developmental Alterations Indicating Opposite Functions of Cytokinins in the  
730 Regulation of Shoot and Root Meristem Activity. *Plant Cell* **15**:2532–2550.
- 731 **Xie, D. X., Feys, B. F., James, S., Nieto-Rostro, M., and Turner, J. G.** (1998). COI1: An  
732 Arabidopsis gene required for jasmonate-regulated defense and fertility. *Science*  
733 **280**:1091–1094.
- 734 **Xing, H.-L., Wang, Z.-P., Zhang, H.-Y., Han, C.-Y., Liu, B., Wang, X.-C., Chen, Q.-J.,**  
735 **and Dong, L.** (2014). A CRISPR/Cas9 toolkit for multiplex genome editing in plants.  
736 *BMC Plant Biol.* **14**:372.
- 737 **Yan, Y., Stolz, S., Chételat, A., Reymond, P., Pagni, M., Dubugnon, L., and Farmer, E.**  
738 **E.** (2007). A downstream mediator in the growth repression limb of the jasmonate  
739 pathway. *Plant Cell* **19**:2470–2483.
- 740 **Yang, S., Poretska, O., and Sieberer, T.** (2018). ALTERED MERISTEM PROGRAM1  
741 restricts shoot meristem proliferation and regeneration by limiting HD-ZIP III-mediated  
742 expression of RAP2.6l. *Plant Phys.* **177**:1580–1594.
- 743 **Zhang, F., Yao, J., Ke, J., Zhang, L., Lam, V. Q., Xin, X. F., Zhou, X. E., Chen, J.,**  
744 **Brunzelle, J., Griffin, P. R., et al.** (2015). Structural basis of JAZ repression of MYC  
745 transcription factors in jasmonate signalling. *Nature* **525**:269–273.
- 746 **Zhang, G., Zhao, F., Chen, L., Pan, Y., Sun, L., Bao, N., Zhang, T., Cui, C. X., Qiu, Z.,**  
747 **Zhang, Y., et al.** (2019). Jasmonate-mediated wound signalling promotes plant  
748 regeneration. *Nat. Plants* **5**:491–497.
- 749 **Zhou, W., Lozano-Torres, J. L., Blilou, I., Zhang, X., Zhai, Q., Smant, G., Li, C., and**  
750 **Scheres, B.** (2019). A Jasmonate Signaling Network Activates Root Stem Cells and  
751 Promotes Regeneration. *Cell* **177**:942-956.e14.
- 752 **Zhu, Z., An, F., Feng, Y., Li, P., Xue, L., A, M., Jiang, Z., Kim, J.-M., To, T. K., Li, W.,**  
753 **et al.** (2011). Derepression of ethylene-stabilized transcription factors (EIN3/EIL1)  
754 mediates jasmonate and ethylene signaling synergy in Arabidopsis. *Proc. Natl. Acad.*  
755 *Sci. U S A* **108**:12539–12544.
- 756

757 **FIGURE LEGENDS**

758

759 **Figure 1: A genetic model for the action of JA signaling components during ARI.** With a  
760 low auxin signaling input, the JA pool increases in the hypocotyl. This triggers degradation of  
761 the targeted JAZs, thereby releasing transcriptional activity of the MYC2, 3, 4 and inhibiting  
762 ARI. With a high auxin signaling input, the JA pool decreases in the hypocotyl, thereby  
763 repressing the MYC-mediated JA signaling machinery and increasing ARI (Gutierrez et al.,  
764 2012; Lakehal et al., 2019a).

765

766 **Figure 2: JA signaling inhibits ARI in NINJA-dependent and -independent manners.**

767 (A) Average number of ARs observed in indicated multiple *jaz* mutants and wild-type (Col-0)  
768 seedlings. Data are pooled and averaged numbers observed in three biological replicates of at  
769 least 40 seedlings. One-way ANOVA combined with Tukey's multiple comparison post-tests  
770 showed that the *jaz1jaz3jaz4jaz9jaz10* produced significantly more ARs than wild-type plants.  
771 Error bars indicate  $\pm$  SEM ( $n \geq 40$ ;  $P < 0.05$ ).

772 (B) Average number of ARs produced by JA signaling mutants. A non-parametric Kruskal-  
773 Wallis test followed by Dunn's multiple comparison test indicated that mutations in the *MYC2*  
774 or *NINJA* genes result in significant differences in AR number, relative to wild-type numbers.  
775 Error bars indicate  $\pm$  SEM ( $n \geq 40$ ;  $P < 0.02$ ). Values marked with asterisks significantly differ  
776 from corresponding wild-type values and those marked with hash signs significantly differ from  
777 values obtained for the single *ninja-1* or *ninja-2* mutants.

778 (C) Lateral root density of JA signaling mutants and wild-type seedlings grown in AR  
779 phenotyping conditions. One-way ANOVA combined with Tukey's multiple comparison post-  
780 test indicated that the *myc2-322B* and *ninja-1myc2-322B* mutants had slightly lower and  
781 slightly higher than wild-type LR densities, respectively. Error bars indicate  $\pm$  SEM ( $n \geq 40$ ;  $P$   
782  $< 0.05$ ).

783 (D) to (E) Representative photos of (D) wild-type and (E) *ninja-1myc2-322B* double mutant  
784 seedlings. Scale bars represent 6 mm. Arrowheads indicate hypocotyl-root junctions (white) or  
785 ARs (red).

786

787

788

789

790

791 **Figure 3: NINJA-dependent JA signaling inhibit ARI in pericycle cells.**

792 (A) to (E) Spatiotemporal activity patterns of the *NINJA* and *MYC2* promoters, left and right,  
793 respectively in each panel. Seedlings expressing the *pNINJA:GUSplus* or *pMYC2:GUSplus*  
794 constructs were grown in the dark until their hypocotyls were 6-7 mm long (T0) (A) then either  
795 kept in the dark for 9 h (T9D) (B) and 24 h (T24D) (C) or transferred to the light for 9 h (T9L)  
796 (D) or 24 h (T24L) (E). Scale bars represent 6 mm.

797 (F) to (H) Representative images of etiolated hypocotyls expressing  
798 *pNINJA:NINJA:mCITRINE* (F), *pGATA23:NINJA:mCITRINE* (G), and  
799 *pXPP:NINJA:mCITRINE* (H) of seedlings grown in darkness until their hypocotyls were 6-7  
800 mm long. The cell walls were counterstained magenta with propidium iodide (PI). Orthogonal  
801 views from epidermis to vasculature are shown in the top panels. Z-projections of the hypocotyl  
802 volume around the vasculature are shown in the bottom panels. The following cell types can be  
803 distinguished: Epidermis (Ep), Cortex (Co), Endodermis (En), Pericycle (Pe) and Xylem (Xy).  
804 In orthogonal views, the two protoxylem elements allow deduction of the direction of the xylem  
805 axis and thus the position of the xylem-pole pericycle. Arrowheads indicate signals in xylem-  
806 pole pericycle cells in green.

807 (I) Average numbers of ARs produced by the *ninja-1myc2-322B* double mutant, two  
808 independent transgenic lines expressing *pXPP:NINJA:mCITRINE/ninja-1myc2-322B* or  
809 *pGATA23:NINJA:mCITRINE/ninja-1myc2-322B* and wild-type (Col-0) seedlings. A non-  
810 parametric Kruskal-Wallis test followed by Dunn's multiple comparison post-test indicated that  
811 *pXPP:NINJA:mCITRINE/ninja-1myc2-322B* (#14.7 and #11.3) and  
812 *pGATA23:NINJA:mCITRINE/ninja-1myc2-322B* (#2.4 and #5.8) produced significantly more  
813 ARs than the *ninja1myc2-322B* double mutant. Error bars indicate  $\pm$  SEM ( $n \geq 30$ ;  $P < 0.006$ ).  
814

815 **Figure 4: RNA-Seq revealed several DEGs between the *ninja-1myc2-322B* double mutant**  
816 **and wild-type seedlings.**

817 (A) Schematic representation of the RNA-Seq experiment. Total RNA was extracted from  
818 hypocotyls of *ninja-1myc2-322B* double mutant and wild-type seedlings grown in the dark until  
819 their hypocotyls were 6-7 mm long (T0), and after their transfer to the light for 9 h (T9) or 24  
820 h (T24).

821 (B) Venn diagram summarizing the DEGs between *ninja-1myc2-322B* double mutant and wild-  
822 type seedlings. (C) Enrichment of G-box (CACGTG, CACATG) or G-box-like (AACGTG,  
823 CATGTG CACGCG or CACGAG) motifs in the DEGs. Colors indicate upregulated genes

824 (red) or downregulated genes (blue) containing at least one of the motifs. The gray color  
825 indicates the remaining DEGs, containing none of the mentioned motifs.

826 (D) Heatmap of expression of the 13 *JAZ* genes. The map is based on fold-differences ( $\log_2$ ) in  
827 transcript abundance (based on RNA-Seq data) in *ninja-1myc2-322B* double mutant samples  
828 relative to the abundance in wild-type samples. Colors indicate upregulated genes (red) and  
829 downregulated genes (blue) in *ninja-1myc2-322B* double mutant relative to expression levels  
830 in wild-type seedlings. Values marked with asterisks are statistically significant.

831 (E) Heatmap of expression selected JA biosynthesis genes. The map is based on fold-  
832 differences ( $\log_2$ ) in transcript abundance (based on RNA-Seq data) in *ninja-1myc2-322B*  
833 double mutant samples relative to the abundance in wild-type samples. Colors indicate  
834 upregulated genes (red) and downregulated genes (blue) in *ninja-1myc2-322B* relative to wild-  
835 type expression levels. Values marked with asterisks are statistically significant.

836 (F) to (H) Endogenous jasmonate contents. (F) *cis*-OPDA, (G) free JA and (H) JA-Ile contents  
837 of hypocotyls of *ninja-1myc2-322B* and wild-type seedlings grown in the dark until their  
838 hypocotyls were 6 mm long (T0) and after their transfer to the light for 9 h (T9) and 24 h (T24).  
839 Asterisks indicate statistically significant differences between the mutant lines and wild-type  
840 plants according to ANOVA analysis (\*, \*\*, and \*\*\* indicate p values of  $0.05 > p > 0.01$ ,  $0.01$   
841  $> p > 0.001$ , and  $p < 0.001$ , respectively). Error bars indicate  $\pm$  SD of six biological replicates.  
842

843 **Figure 5: *ERF113*, *ERF114* and *ERF115* are induced by JA signaling.**

844 (A) Heatmap of expression of the subgroup X *ERF* family members. The map is based on fold-  
845 differences ( $\log_2$ ) in transcript abundance (based on RNA-Seq data) in *ninja-1myc2-322B*  
846 double mutant samples relative to the abundance in wild-type samples. Colors indicate  
847 upregulated genes (red) or downregulated genes (blue) in *ninja-1myc2-322B* relative to wild  
848 type expression levels. Values marked with asterisks are statistically significant.

849 (B) Phylogenetic tree of subgroup X of the AP2/ERF protein family derived from protein  
850 sequence alignment by the maximum likelihood method using MEGA X software (Kumar et  
851 al., 2018).

852 (C) Validation by qRT-PCR of mutation-induced shifts in *ERF113*, *ERF114* and *ERF115*  
853 expression profiles in the *ninja-1myc2-322B* double mutant (abundance of transcripts, in  $\log_{10}$   
854 scale, at indicated time points relative to their abundance in wild-type seedlings, which was  
855 arbitrarily set to 1). Error bars indicate  $\pm$ SE obtained from three independent technical  
856 replicates. Asterisks mark significance differences between the genotypes according to a *t*-test

857 (P < 0.001, n = 3). The experiment was repeated twice with independent biological replicates  
858 and gave similar results.

859

860 **Figure 6: The *ERF115* gene is an inhibitor of ARI.**

861 (A) Average numbers of AR produced by *erf* mutants and wild-type seedlings. One-way  
862 ANOVA combined with Tukey's multiple comparison post-test indicated that only the triple  
863 mutant *rap2-6lerf114Cerf115* significantly differed in this respect from wild-type (Col-0)  
864 plants. Error bars indicate  $\pm$  SEM (n  $\geq$  40, P < 0.001).

865 (B) Average numbers of ARs produced by *35S:ERF115* and *pERF115:ERF115:SRDX* relative  
866 to numbers produced by wild-type plants. Data from two independent biological replicates,  
867 each of at least 40 seedlings, were pooled and averaged. A non-parametric Kruskal-Wallis test  
868 followed by Dunn's multiple comparison test indicated that numbers of ARs produced by the  
869 transgenic and wild-type plants significantly differed. Error bars indicate  $\pm$  SEM (n  $\geq$  40, P <  
870 0.02).

871 (C) LR density of *35S:ERF115* and *pERF115:ERF115:SRDX* lines and wild type plants in AR  
872 phenotyping conditions. *35S:ERF115* mutants had significantly lower LR density than wild-  
873 type plants according to one-way ANOVA followed by Tukey's multiple comparison test.

874 (D) Spatiotemporal activity pattern of the *ERF115* promoter, as shown by seedlings expressing  
875 the *pERF115:GUS* construct grown in the dark until their hypocotyls were 6-7 mm long (T0),  
876 and 24 h (T24L) after either transfer to the light or further growth in the dark (T24D). Scale  
877 bars represent 6 mm.

878 (E) Validation by qRT-PCR of *ERF115* expression patterns in wild-type plants. Presented gene  
879 expression values are relative (in log<sub>10</sub> scale) to the expression at T0, for which the value was  
880 arbitrarily set to 1. Error bars indicate  $\pm$ SE obtained from three independent technical replicates.  
881 A *t*-test indicated that values indicated by an Asterisks indicate values that significantly differ  
882 from the T0 values (P < 0.001, n = 3). The experiment was repeated twice with independent  
883 biological replicates and gave similar results.

884 (F) to (H) Representative photos of (F) wild-type, (G) *35S:ERF115*, and (H)  
885 *pERF115:ERF115:SRDX* seedlings.

886 (I) to (J) Representative photos of wild-type and *35S:ERF115* seedlings grown in the dark until  
887 their hypocotyls were 6-7 mm long, then transferred to fresh medium containing either mock  
888 solution or 1  $\mu$ M naphthaleneacetic acid (NAA) for seven more days under long-day conditions  
889 to induce ARs. Arrowheads indicate hypocotyl-root junctions (white) or ARs (red). Scale bars  
890 represent 6 mm.



891 (K) Average numbers of ARs produced by wild-type and *35S:ERF115* plants in response to  
892 NAA. Wild-type seedlings produced significantly more ARs after NAA treatment than after  
893 mock-treatment according to a Mann-Whitney test ( $n \geq 40$ ,  $P < 0.0001$ ), but NAA treatment  
894 had no significant effect on AR production by *35S:ERF115* plants. Error bars indicate  $\pm$  SEM.  
895

896 **Figure 7: Cytokinins inhibit ARI downstream of *ERF115*.**

897 (A) Average numbers of ARs produced by wild-type (Col-0) seedlings, which were grown in  
898 the dark until their hypocotyls were 6-7 mm long, then transferred to fresh medium containing  
899 either mock solution or solutions with indicated concentrations of 6-Benzylaminopurine (6-  
900 BA). The seedlings were kept for seven more days under long-day conditions to induce ARs.  
901 Seedlings treated with 0.25  $\mu$ M or 0.5  $\mu$ M 6-BA significantly differed from the mock-treated  
902 controls, according to a non-parametric Kruskal-Wallis test followed by Dunn's multiple  
903 comparison test. Error bars indicate  $\pm$  SEM ( $n \geq 40$ ,  $P < 0.004$ ).

904 (B) to (D) Average numbers of ARs produced by wild-type plants and: (B) *ipt3ipt5ipt7* triple  
905 mutants defective in CK biosynthesis, (C) *35S:CKX1 CYTOKININ OXIDASE1*-overexpressing  
906 plants, which have reduced CK contents due to increased rates of degradation, and (D) CK  
907 signaling mutants.

908 (E) Relative amounts of *ARR5* and *ARR7* transcripts quantified by qRT-PCR. Total RNA was  
909 extracted from hypocotyls of *35S:ERF115* and the wild-type seedlings grown in AR-inducing  
910 conditions, as outlined above, at T0 (at the end of the dark incubation) and T24 (24 hours later).  
911 The gene expression values are relative to wild-type values, which were arbitrarily set to 1. The  
912 Y axis scale is a  $\log_{10}$  scale. Error bars indicate  $\pm$  SEM obtained from three technical replicates.  
913 Asterisks indicate values that significantly differ from wild-type values according to a *t*-test ( $P$   
914  $< 0.001$ ,  $n = 3$ ). The experiment was repeated once with an independent biological replicate and  
915 gave similar results.

916 (F) Endogenous contents of active CK bases. The CK bases were quantified in the hypocotyls  
917 of *35S:ERF115* and the wild-type seedlings grown in the dark until they were 6-7 mm long  
918 (T0) and after their transfer to the light for 9 h (T9) or 24 h (T24). Asterisks indicate statistically  
919 significant differences between mutant and wild-type plants according to ANOVA (\*, \*\*, and  
920 \*\*\* indicate  $P$ -values of  $0.05 > P > 0.01$ ,  $0.01 > P > 0.001$ , and  $P < 0.001$ , respectively). Error  
921 bars indicate  $\pm$  SD of six biological replicates.

922 (G) Average numbers of ARs produced by *35S:ERF115* plants, *35S:ERF115* plants  
923 overexpressing *CKX1* from a *35S:CKX1* construct and the *ipt3,5,7* triple mutant overexpressing  
924 *ERF115* from a *35S:ERF115* construct. Numbers produced by the multiple mutants



925 significantly differed from numbers produced by *35S:ERF115* plants according to a non-  
926 parametric Kruskal-Wallis test followed by Dunn's multiple comparison test. Error bars  
927 indicate  $\pm$  SEM ( $n \geq 40$ ,  $P < 0.0001$ ).

928

929

930

931  
932  
933  
934  
935  
936  
937  
938  
939  
940

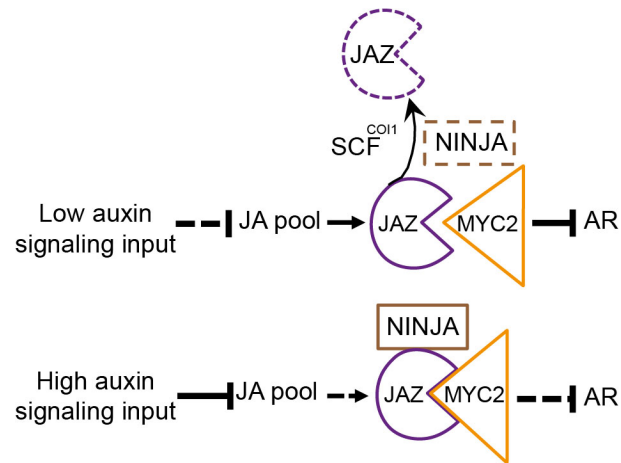

941 **Figure 1: A genetic model for the action of JA signaling components during ARI.** With a  
942 low auxin signaling input, the JA pool increases in the hypocotyl. This triggers degradation of  
943 the targeted JAZs, thereby releasing transcriptional activity of the MYC2, 3, 4 and inhibiting  
944 ARI. With a high auxin signaling input, the JA pool decreases in the hypocotyl, thereby  
945 repressing the MYC-mediated JA signaling machinery and increasing ARI (Gutierrez et al.,  
946 2012; Lakehal et al., 2019a).  
947

948  
949  
950  
951  
952  
953  
954  
955  
956  
957  
958  
959  
960  
961  
962  
963  
964  
965  
966  
967  
968  
969  
970  
971  
972  
973  
974

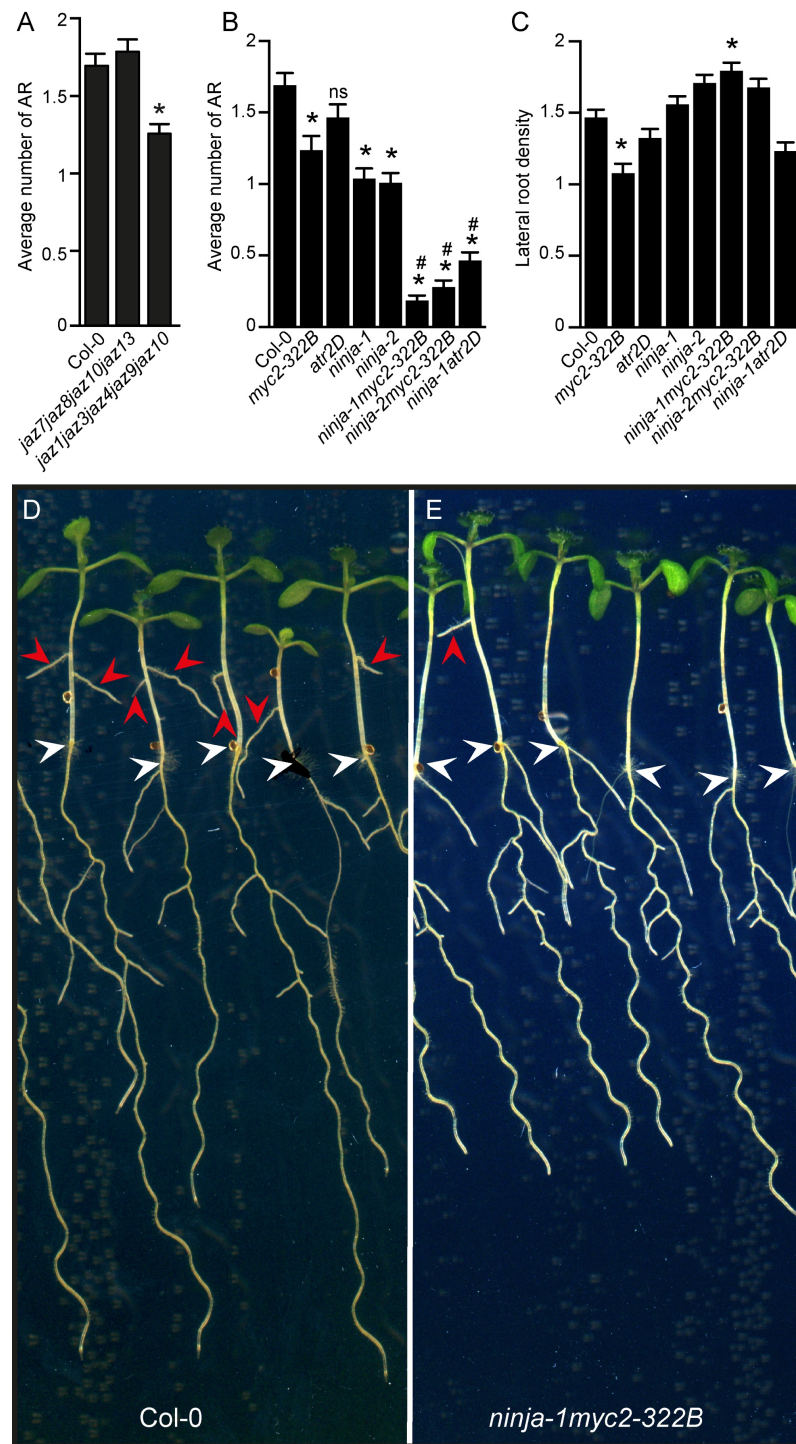

975 **Figure 2: JA signaling inhibits ARI in NINJA-dependent and -independent manners.**  
976 (A) Average number of ARs observed in indicated multiple *jaz* mutants and wild-type (Col-0)  
977 seedlings. Data are pooled and averaged numbers observed in three biological replicates of at  
978 least 40 seedlings. One-way ANOVA combined with Tukey's multiple comparison post-tests  
979 showed that the *jaz1jaz3jaz4jaz9jaz10* produced significantly more ARs than wild-type plants.  
980 Error bars indicate  $\pm$  SEM ( $n \geq 40$ ;  $P < 0.05$ ). (B) Average number of ARs produced by JA  
981 signaling mutants. A non-parametric Kruskal-Wallis test followed by Dunn's multiple

982 comparison test indicated that mutations in the *MYC2* or *NINJA* genes result in significant  
983 differences in AR number, relative to wild-type numbers. Error bars indicate  $\pm$  SEM ( $n \geq 40$ ;  $P$   
984  $< 0.02$ ). Values marked with asterisks significantly differ from corresponding wild-type values  
985 and those marked with hash signs significantly differ from values obtained for the single *ninja-*  
986 *1* or *ninja-2* mutants. (C) Lateral root density of JA signaling mutants and wild-type seedlings  
987 grown in AR phenotyping conditions. One-way ANOVA combined with Tukey's multiple  
988 comparison post-test indicated that the *myc2-322B* and *ninja-1myc2-322B* mutants had slightly  
989 lower and slightly higher than wild-type LR densities, respectively. Error bars indicate  $\pm$  SEM  
990 ( $n \geq 40$ ;  $P < 0.05$ ). (D-E) Representative photos of (D) wild-type and (E) *ninja-1myc2-322B*  
991 double mutant seedlings. Scale bars represent 6 mm. Arrowheads indicate hypocotyl-root  
992 junctions (white) or ARs (red).  
993

994  
995  
996  
997  
998  
999  
1000  
1001  
1002  
1003  
1004  
1005  
1006  
1007  
1008  
1009  
1010  
1011  
1012  
1013  
1014  
1015  
1016  
1017

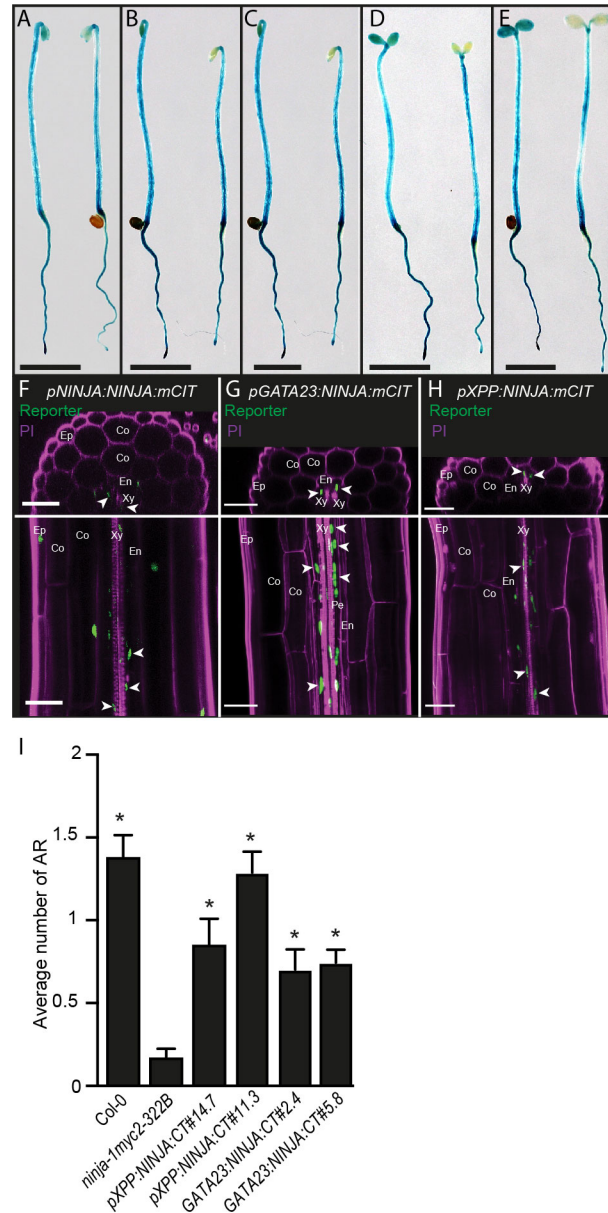

1018 **Figure 3: NINJA-dependent JA signaling inhibits ARI in pericycle cells.**  
 1019 (A) to (E) Spatiotemporal activity patterns of the *NINJA* and *MYC2* promoters, left and right,  
 1020 respectively in each panel. Seedlings expressing the *pNINJA:GUSplus* or *pMYC2:GUSplus*  
 1021 constructs were grown in the dark until their hypocotyls were 6-7 mm long (T0) (A) then either  
 1022 kept in the dark for 9 h (T9D)(B) and 24 h (T24D)(C) or transferred to the light for 9 h (T9L)(D)  
 1023 or 24 h (T24L)(E). Scale bars represent 6 mm.  
 1024 (F) to (H) Representative images of etiolated hypocotyls expressing  
 1025 *pNINJA:NINJA:mCITRINE* (F), *pGATA23:NINJA:mCITRINE* (G), and  
 1026 *pXPP:NINJA:mCITRINE* (H) of seedlings grown in darkness until their hypocotyls were 6-7  
 1027 mm long. The cell walls were counterstained magenta with propidium iodide (PI). Orthogonal

1028 views from epidermis to vasculature are shown in the top panels. Z-projections of the hypocotyl  
1029 volume around the vasculature are shown in the bottom panels. The following cell types can be  
1030 distinguished: Epidermis (Ep), Cortex (Co), Endodermis (En), Pericycle (Pe) and Xylem (Xy).  
1031 In orthogonal views, the two protoxylem elements allow deduction of the direction of the xylem  
1032 axis and thus the position of the xylem-pole pericycle. Arrowheads indicate signals in xylem-  
1033 pole pericycle cells in green.

1034 (I) Average numbers of ARs produced by the *ninja-1myc2-322B* double mutant, two  
1035 independent transgenic lines expressing *pXPP:NINJA:mCITRINE/ninja-1myc2-322B* or  
1036 *pGATA23:NINJA:mCITRINE/ninja-1myc2-322B* and wild-type (Col-0) seedlings. A non-  
1037 parametric Kruskal-Wallis test followed by Dunn's multiple comparison post-test indicated that  
1038 *pXPP:NINJA:mCITRINE/ninja-1myc2-322B* (#14.7 and #11.3) and  
1039 *pGATA23:NINJA:mCITRINE/ninja-1myc2-322B* (#2.4 and #5.8) produced significantly more  
1040 ARs than the *ninja1myc2-322B* double mutant. Error bars indicate  $\pm$  SEM ( $n \geq 30$ ;  $P < 0.006$ ).  
1041

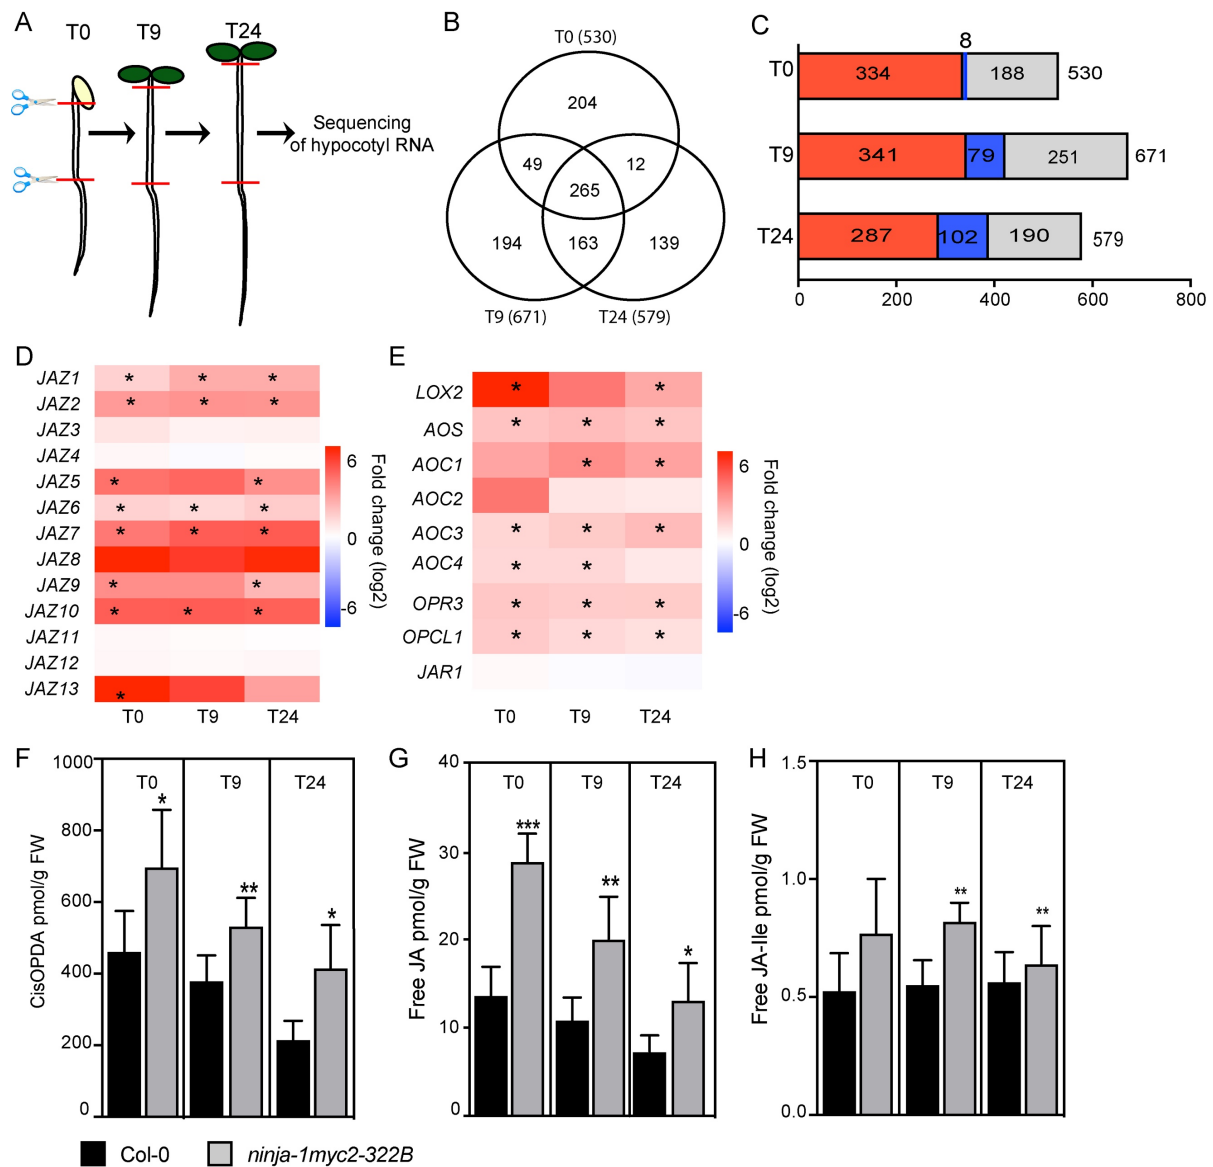

1042

■ Col-0 ■ *ninja-1myc2-322B*

1043 **Figure 4: RNA-Seq revealed several DEGs between the *ninja-1myc2-322B* double mutant**  
 1044 **and wild-type seedlings.**

1045 (A) Schematic representation of the RNA-Seq experiment. Total RNA was extracted from  
 1046 hypocotyls of *ninja-1myc2-322B* double mutant and wild-type seedlings grown in the dark until  
 1047 their hypocotyls were 6-7 mm long (T0), and after their transfer to the light for 9 h (T9) or 24  
 1048 h (T24).

1049 (B) Venn diagram summarizing the DEGs between *ninja-1myc2-322B* double mutant and wild-  
 1050 type seedlings. (C) Enrichment of G-box (CACGTG, CACATG) or G-box-like (AACGTG,  
 1051 CATGTG CACGCG or CACGAG) motifs in the DEGs. Colors indicate upregulated genes  
 1052 (red) or downregulated genes (blue) containing at least one of the motifs. The gray color  
 1053 indicates the remaining DEGs, containing none of the mentioned motifs.



1054 (D) Heatmap of expression of the 13 *JAZ* genes. The map is based on fold-differences ( $\log_2$ ) in  
1055 transcript abundance (based on RNA-Seq data) in *ninja-1myc2-322B* double mutant samples  
1056 relative to the abundance in wild-type samples. Colors indicate upregulated genes (red) and  
1057 downregulated genes (blue) in *ninja-1myc2-322B* double mutant relative to expression levels  
1058 in wild-type seedlings. Values marked with asterisks are statistically significant.

1059 (E) Heatmap of expression selected JA biosynthesis genes. The map is based on fold-  
1060 differences ( $\log_2$ ) in transcript abundance (based on RNA-Seq data) in *ninja-1myc2-322B*  
1061 double mutant samples relative to the abundance in wild-type samples. Colors indicate  
1062 upregulated genes (red) and downregulated genes (blue) in *ninja-1myc2-322B* relative to wild-  
1063 type expression levels. Values marked with asterisks are statistically significant.

1064 (F) to (H) Endogenous jasmonate contents. (F) *cis*-OPDA, (G) free JA and (H) JA-Ile contents  
1065 of hypocotyls of *ninja-1myc2-322B* and wild-type seedlings grown in the dark until their  
1066 hypocotyls were 6 mm long (T0) and after their transfer to the light for 9 h (T9) and 24 h (T24).  
1067 Asterisks indicate statistically significant differences between the mutant lines and wild-type  
1068 plants according to ANOVA analysis (\*, \*\*, and \*\*\* indicate  $p$  values of  $0.05 > p > 0.01$ ,  $0.01$   
1069  $> p > 0.001$ , and  $p < 0.001$ , respectively). Error bars indicate  $\pm$  SD of six biological replicates.  
1070

1071  
1072  
1073  
1074  
1075  
1076  
1077  
1078  
1079  
1080  
1081  
1082  
1083  
1084  
1085  
1086  
1087  
1088  
1089  
1090  
1091  
1092  
1093  
1094  
1095  
1096  
1097  
1098  
1099  
1100  
1101  
1102  
1103  
1104  
1105  
1106  
1107

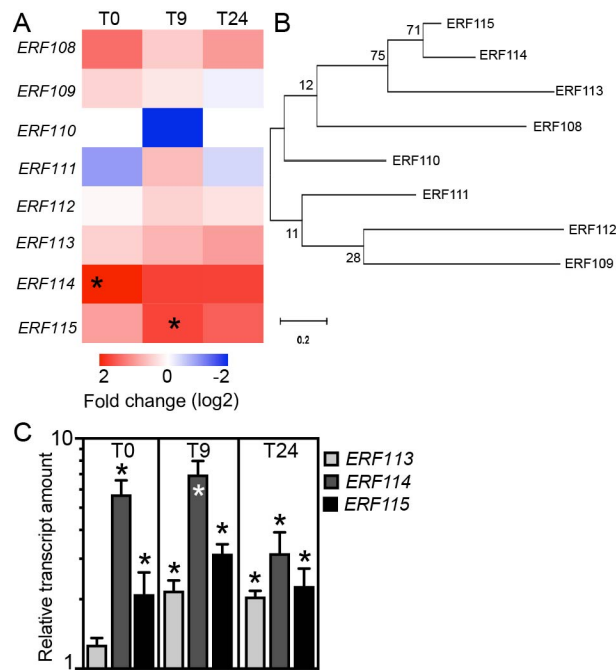

**Figure 5: *ERF113*, *ERF114* and *ERF115* are induced by JA signaling.**

(A) Heatmap of expression of the subgroup X *ERF* family members. The map is based on fold-differences (log<sub>2</sub>) in transcript abundance (based on RNA-Seq data) in *ninja-1myc2-322B* double mutant samples relative to the abundance in wild-type samples. Colors indicate upregulated genes (red) or downregulated genes (blue) in *ninja-1myc2-322B* relative to wild type expression levels. Values marked with asterisks are statistically significant.

(B) Phylogenetic tree of subgroup X of the AP2/ERF protein family derived from protein sequence alignment by the maximum likelihood method using MEGA X software (Kumar et al., 2018).

(C) Validation by qRT-PCR of mutation-induced shifts in *ERF113*, *ERF114* and *ERF115* expression profiles in the *ninja-1myc2-322B* double mutant (abundance of transcripts, in log<sub>10</sub> scale, at indicated time points relative to their abundance in wild-type seedlings, which was arbitrarily set to 1). Error bars indicate ±SE obtained from three independent technical replicates. Asterisks mark significance differences between the genotypes according to a *t*-test ( $P < 0.001$ ,  $n = 3$ ). The experiment was repeated twice with independent biological replicates and gave similar results.

1108

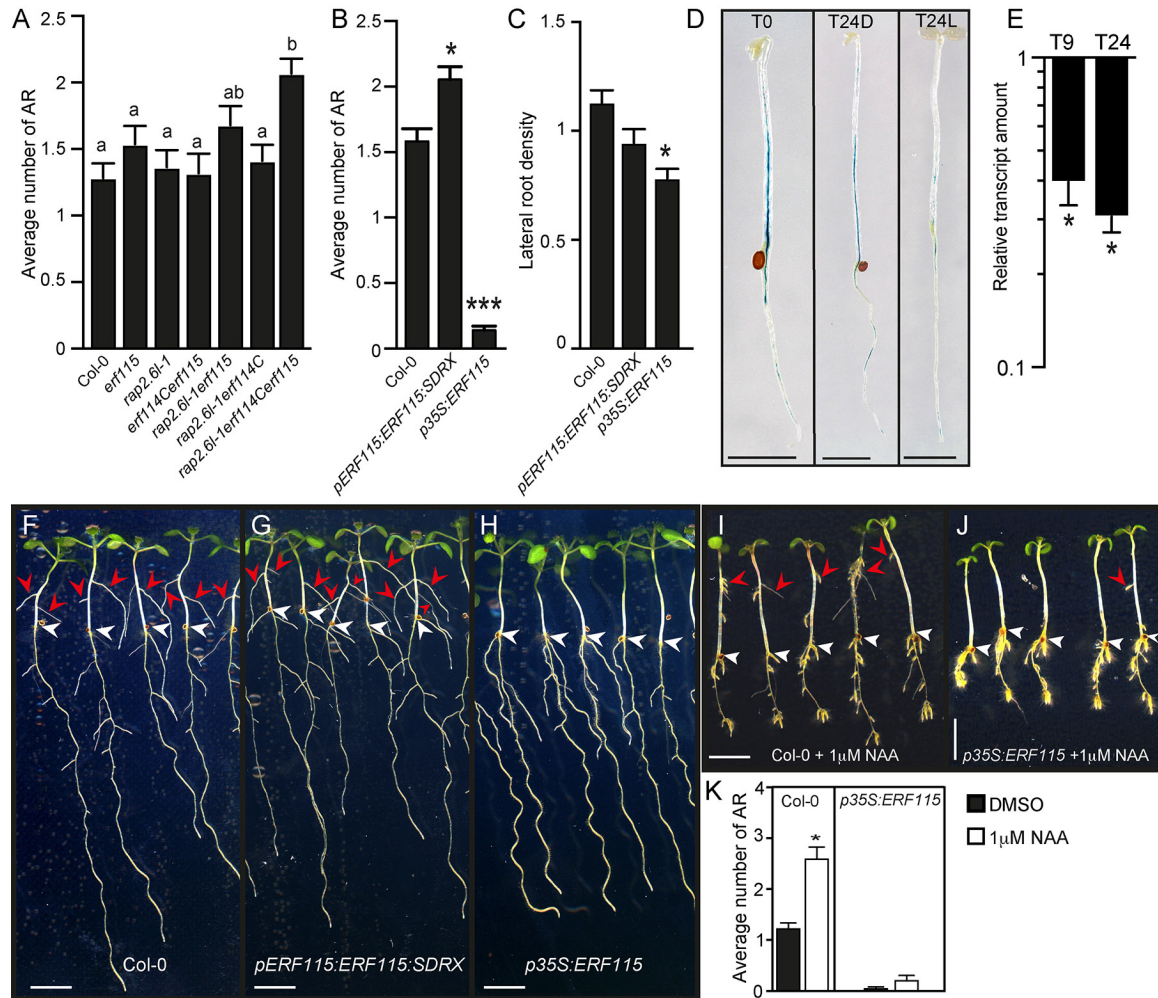

1109

1110

1111 **Figure 6: The *ERF115* gene is an inhibitor of ARI.**

1112 (A) Average numbers of AR produced by *erf* mutants and wild-type seedlings. One-way  
 1113 ANOVA combined with Tukey's multiple comparison post-test indicated that only the triple  
 1114 mutant *rap2-6lerf114Cerf115* significantly differed in this respect from wild-type (Col-0)  
 1115 plants. Error bars indicate  $\pm$  SEM ( $n \geq 40$ ,  $P < 0.001$ ).

1116 (B) Average numbers of ARs produced by *35S:ERF115* and *pERF115:ERF115:SDRX* relative  
 1117 to numbers produced by wild-type plants. Data from two independent biological replicates,  
 1118 each of at least 40 seedlings, were pooled and averaged. A non-parametric Kruskal-Wallis test  
 1119 followed by Dunn's multiple comparison test indicated that numbers of ARs produced by the  
 1120 transgenic and wild-type plants significantly differed. Error bars indicate  $\pm$  SEM ( $n \geq 40$ ,  $P <$   
 1121  $0.02$ ).

1122 (C) LR density of *35S:ERF115* and *pERF115:ERF115:SDRX* lines and wild type plants in AR  
 1123 phenotyping conditions. *35S:ERF115* mutants had significantly lower LR density than wild-  
 1124 type plants according to one-way ANOVA followed by Tukey's multiple comparison test.

1125 (D) Spatiotemporal activity pattern of the *ERF115* promoter, as shown by seedlings expressing  
1126 the *pERF115:GUS* construct grown in the dark until their hypocotyls were 6-7 mm long (T0),  
1127 and 24 h (T24L) after either transfer to the light or further growth in the dark (T24D). Scale  
1128 bars represent 6 mm.

1129 (E) Validation by qRT-PCR of *ERF115* expression patterns in wild-type plants. Presented gene  
1130 expression values are relative (in log<sub>10</sub> scale) to the expression at T0, for which the value was  
1131 arbitrarily set to 1. Error bars indicate  $\pm$ SE obtained from three independent technical replicates.  
1132 A *t*-test indicated that values indicated by an Asterisks indicate values that significantly differ  
1133 from the T0 values ( $P < 0.001$ ,  $n = 3$ ). The experiment was repeated twice with independent  
1134 biological replicates and gave similar results.

1135 (F) to (H) Representative photos of (F) wild-type, (G) *35S:ERF115*, and (H)  
1136 *pERF115:ERF115:SRDX* seedlings.

1137 (I) to (J) Representative photos of wild-type and *35S:ERF115* seedlings grown in the dark until  
1138 their hypocotyls were 6-7 mm long, then transferred to fresh medium containing either mock  
1139 solution or 1  $\mu$ M naphthaleneacetic acid (NAA) for seven more days under long-day conditions  
1140 to induce ARs. Arrowheads indicate hypocotyl-root junctions (white) or ARs (red). Scale bars  
1141 represent 6 mm.

1142 (K) Average numbers of ARs produced by wild-type and *35S:ERF115* plants in response to  
1143 NAA. Wild-type seedlings produced significantly more ARs after NAA treatment than after  
1144 mock-treatment according to a Mann-Whitney test ( $n \geq 40$ ,  $P < 0.0001$ ), but NAA treatment  
1145 had no significant effect on AR production by *35S:ERF115* plants. Error bars indicate  $\pm$  SEM.  
1146

1147  
1148  
1149  
1150  
1151  
1152  
1153  
1154  
1155  
1156  
1157  
1158  
1159  
1160  
1161  
1162  
1163  
1164  
1165  
1166  
1167  
1168  
1169  
1170  
1171  
1172  
1173  
1174  
1175  
1176  
1177  
1178  
1179

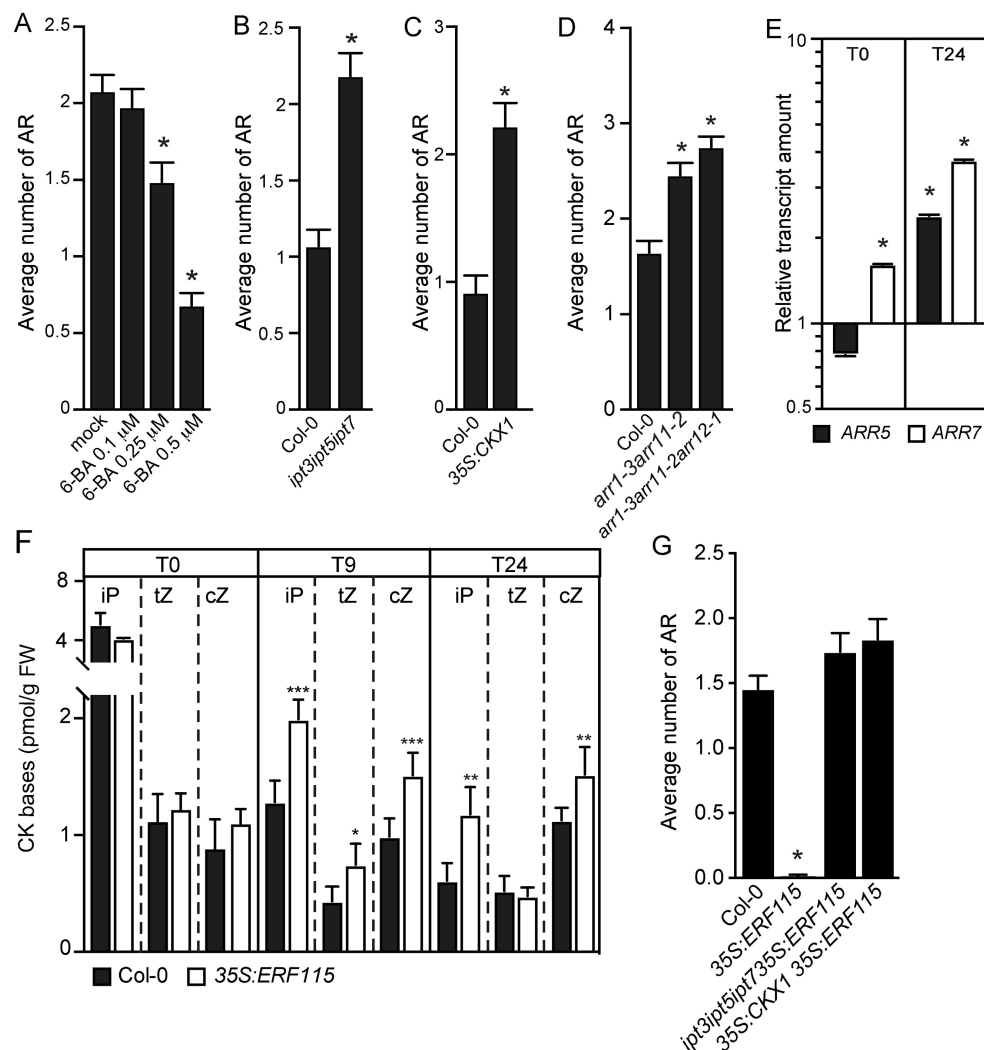

**Figure 7: Cytokinins inhibit ARI downstream of *ERF115*.**

1180 (A) Average numbers of ARs produced by wild-type (Col-0) seedlings, which were grown in  
1181 the dark until their hypocotyls were 6-7 mm long, then transferred to fresh medium containing  
1182 either mock solution or solutions with indicated concentrations of 6-Benzylaminopurine (6-  
1183 BA). The seedlings were kept for seven more days under long-day conditions to induce ARs.  
1184 Seedlings treated with 0.25  $\mu$ M or 0.5  $\mu$ M 6-BA significantly differed from the mock-treated  
1185 controls, according to a non-parametric Kruskal-Wallis test followed by Dunn's multiple  
1186 comparison test. Error bars indicate  $\pm$  SEM ( $n \geq 40$ ,  $P < 0.004$ ).

1187 (B) to (D) Average numbers of ARs produced by wild-type plants and: (B) *ipt3ipt5ipt7* triple  
1188 mutants defective in CK biosynthesis, (C) *35S:CKX1* *CYTOKININ OXIDASE1*-overexpressing  
1189 plants, which have reduced CK contents due to increased rates of degradation, and (D) CK  
1190 signaling mutants.

1191 (E) Relative amounts of *ARR5* and *ARR7* transcripts quantified by qRT-PCR. Total RNA was  
1192 extracted from hypocotyls of *35S:ERF115* and the wild-type seedlings grown in AR-inducing  
1193 conditions, as outlined above, at T0 (at the end of the dark incubation) and T24 (24 hours later).  
1194 The gene expression values are relative to wild-type values, which were arbitrarily set to 1. The  
1195 Y axis scale is a  $\log_{10}$  scale. Error bars indicate  $\pm$  SEM obtained from three technical replicates.  
1196 Asterisks indicate values that significantly differ from wild-type values according to a *t*-test ( $P$   
1197  $< 0.001$ ,  $n = 3$ ). The experiment was repeated once with an independent biological replicate and  
1198 gave similar results.

1199 (F) Endogenous contents of active CK bases. The CK bases were quantified in the hypocotyls  
1200 of *35S:ERF115* and the wild-type seedlings grown in the dark until they were 6-7 mm long  
1201 (T0) and after their transfer to the light for 9 h (T9) or 24 h (T24). Asterisks indicate statistically  
1202 significant differences between mutant and wild-type plants according to ANOVA (\*, \*\*, and  
1203 \*\*\* indicate  $P$ -values of  $0.05 > P > 0.01$ ,  $0.01 > P > 0.001$ , and  $P < 0.001$ , respectively). Error  
1204 bars indicate  $\pm$  SD of six biological replicates.

1205 (G) Average numbers of ARs produced by *35S:ERF115* plants, *35S:ERF115* plants  
1206 overexpressing *CKX1* from a *35S:CKX1* construct and the *ipt3,5,7* triple mutant overexpressing  
1207 *ERF115* from a *35S:ERF115* construct. Numbers produced by the multiple mutants  
1208 significantly differed from numbers produced by *35S:ERF115* plants according to a non-  
1209 parametric Kruskal-Wallis test followed by Dunn's multiple comparison test. Error bars  
1210 indicate  $\pm$  SEM ( $n \geq 40$ ,  $P < 0.0001$ ).

1211



## **Supplemental Information for**

### **Cytokinin induction by the jasmonate-induced *AP2/ERF115* represses adventitious rooting in *Arabidopsis***

**Abdellah Lakehal, Asma Dob, Zahra Rahnesan, Ondřej Novák, Sacha Escamez, Sanaria Alallaq, Miroslav Strnad, Hannele Tuominen, Catherine Bellini**

Corresponding author:

Email: [Catherine.Bellini@umu.se](mailto:Catherine.Bellini@umu.se)

#### **This PDF includes:**

Supplemental Figures 1 to 5

Supplemental Tables 2

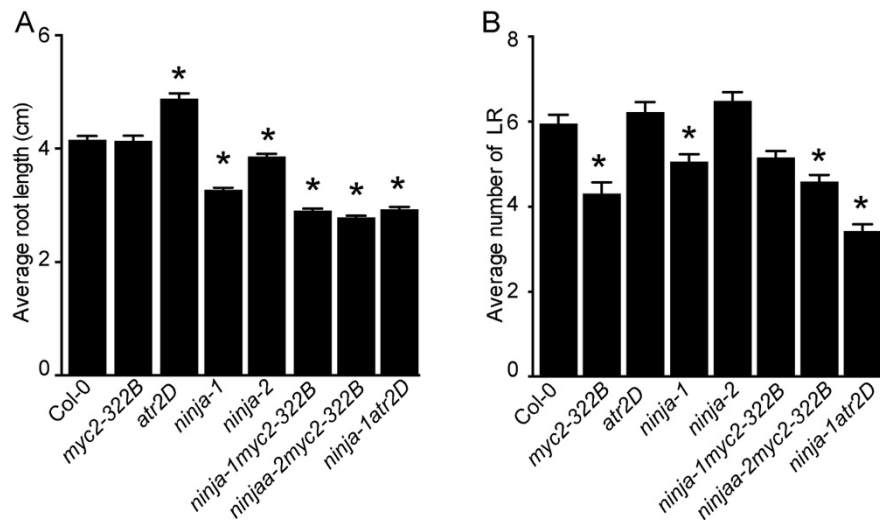

**Supplemental Figure 1 Jasmonate signaling affects primary root (PR) length and lateral root (LR) number.**

(A) PR lengths of wild-type (Col-0) plants and JA signaling mutants grown in AR phenotyping conditions. Asterisks indicate significant differences between the mutants and wild-type plants according to one-way ANOVA followed by Tukey's multiple comparison test. Error bars indicate  $\pm$  SEM ( $n \geq 25$ ,  $P < 0.05$ ).

(B) Numbers of LRs produced by wild-type plants and JA signaling mutants grown in AR phenotyping conditions. Asterisks indicate significant differences between the mutants and wild-type plants according to one-way ANOVA followed by Tukey's multiple comparison test. Error bars indicate  $\pm$  SEM ( $n \geq 25$ ,  $P < 0.05$ ).

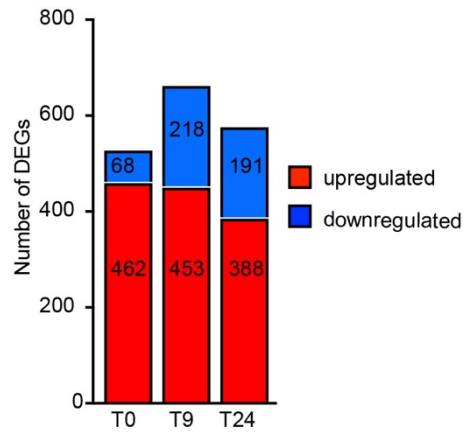

**Supplemental Figure 2 Numbers of DEGs detected in RNA-Seq experiments.**

Red and blue colors respectively indicate up- and down-regulated genes in the *ninja-1myc2-322B* double mutant relative to wild-type expression levels.

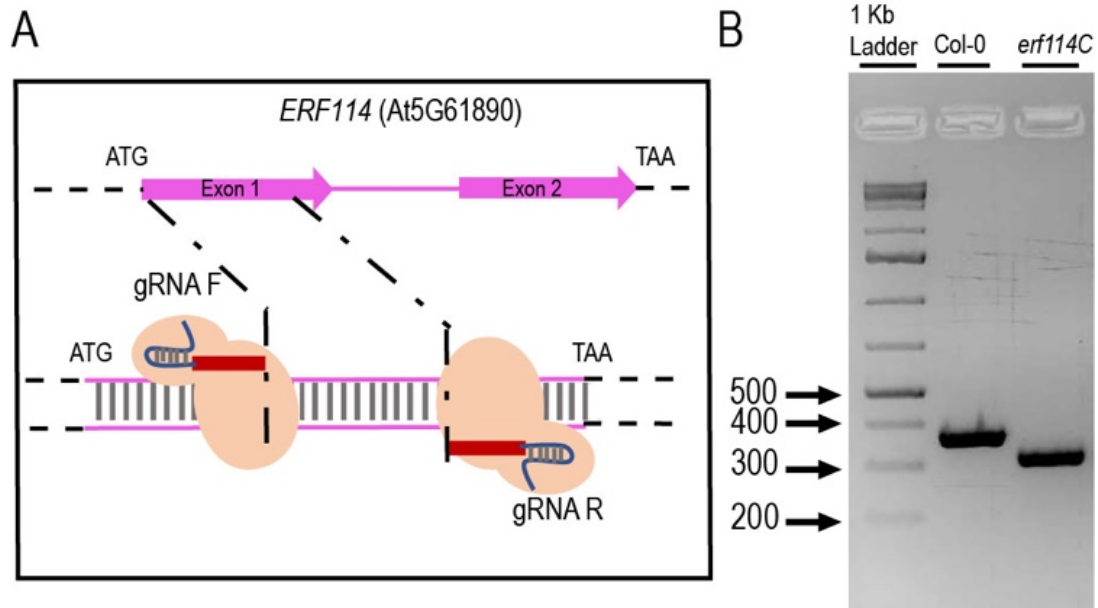

**Supplemental Figure 3 Illustration of the CRISPR-Cas9 strategy.**

(A) Two guide RNAs were designed to target a relatively large DNA fragment of the *ERF114* gene in a *rap2-6l-1* or *erf115* loss-of-function mutant background.

(B) Photo of a representative agarose gel indicating sizes of the wild-type allele *ERF114* and variant *erf114C* with a deletion.

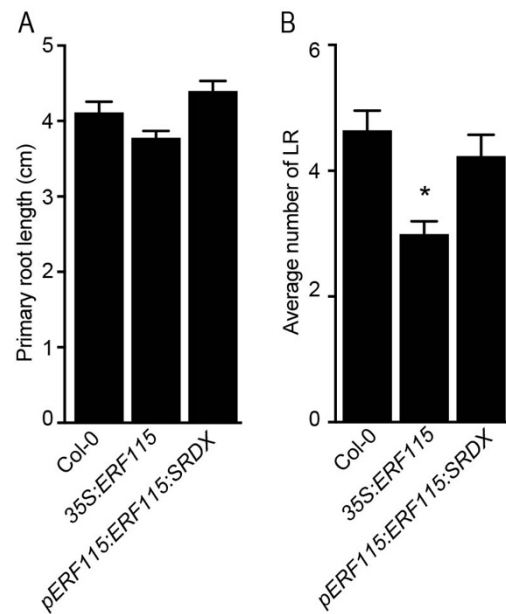

**Supplemental Figure 4 Overexpressing *ERF115* affects the lateral root number.**

(A) Primary root lengths of wild-type, *35S:ERF115* and *pERF115:ERF115:SRDX* plants grown in AR phenotyping conditions. A one-way ANOVA followed by Tukey's multiple comparison post-test. Error bars indicate  $\pm$  SEM ( $n \geq 25$ ,  $P < 0.06$ ).

(B) Numbers of lateral roots produced by wild-type, *35S:ERF115* and *pERF115:ERF115:SRDX* plants grown in AR phenotyping conditions. The asterisk indicates a significant difference between *35S:ERF115* and wild-type plants according to one-way ANOVA followed by Tukey's multiple comparison post-test. Error bars indicate  $\pm$  SEM ( $n \geq 25$ ,  $P < 0.0001$ ).

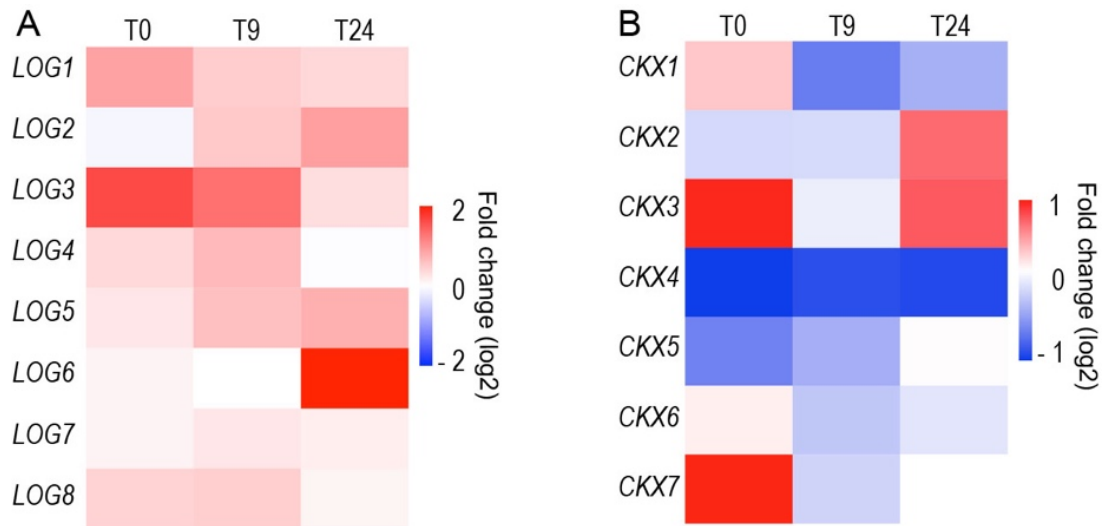

**Supplemental Figure 5 Heatmaps of expression of (A) LOG genes and (B) CKX genes.**

The map is based on fold-differences ( $\log_2$ ) in transcript abundance (based on RNA-seq data) in *ninja-1myc2-322B* double mutant samples relative to wild-type samples. Red and blue colors respectively indicate up- and down-regulated genes in *ninja-1myc2-322B* double mutant relative to wild type expression levels.



## Supplemental Table 2: Primers used for qRT-PCR, cloning and genotyping

| Primer name        | Gene number | Forward primer           | Reverse primer           |
|--------------------|-------------|--------------------------|--------------------------|
| <i>qRT-ERF113</i>  | AT5G13330   | CAAGGCCCTACTACCAC CACAA  | GGTCGAGGAGGAGGTGAGTTC    |
| <i>qRT-ERF114</i>  | AT5G61890   | AGAACTTGTTCCCGGTC TTCTCG | AGTCAAGGCCGAGACCATAACAC  |
| <i>qRT-ERF115</i>  | AT5G07310   | GGAAACCAAAGCAGCTCTCA     | GCAGCTTCAGCAGTCTCAA      |
| <i>qRT-ARR5</i>    | AT3G48100   | TGTCGATAGTGCGACAAGAGC    | CTTCAGATCCTCAAATCCAACC   |
| <i>qRT-ARR7</i>    | AT1G19050   | TCAATGCCAGGACTTTCAGGA    | TGCTCCTTCTTTGAGACATTCTTG |
| <i>qRT-TIP41</i>   | At4g34270   | GCTCATCGGTACGCTCTTTT     | TCCATCAGTCAGAGGCTTCC     |
| <i>qRT-EF1A</i>    | At5g60390   | TGGTGACGCTGGTATGGTTA     | TCCTTCTTGTCCACGCTCTT     |
| <i>Geno-ERF114</i> | AT5G61890   | GATGTTCAACGATGCCATAAAGA  | GATGAGTAGGCGCAACTTGTT    |
| <i>gRNA ERF114</i> | AT5G61890   | GAGATCGGGCCGAGAAGAC      | ATTACTTGAGTCAAGGCCG      |
